1  
2  
3  
4  
5  
6  
7  
8  
9  
10  
11  
12  
13  
14  
15  
16  
17  
18  
19  
20  
21  
22  
23  
24  
25  
26  
27  
28  
29  
30  
31  
32  
33  
34  
35  
36  
37  
38  
39  
40  
41  
42  
43  
44  
45  
46  
47

## **Molecular basis for a germline-biased neutralizing antibody response to SARS-CoV-2**

Sarah A. Clark<sup>1\*</sup>, Lars E. Clark<sup>1\*</sup>, Junhua Pan<sup>1\*</sup>, Adrian Coscia<sup>1</sup>, Lindsay G.A. McKay<sup>2</sup>, Sundaresh Shankar<sup>1</sup>, Rebecca I. Johnson<sup>2</sup>, Anthony Griffiths<sup>2</sup>, Jonathan Abraham<sup>1,3,4,5#</sup>

<sup>1</sup>Department of Microbiology, Blavatnik Institute, Harvard Medical School, Boston, MA 02115, USA

<sup>2</sup>Department of Microbiology and National Emerging Infectious Diseases Laboratories, Boston University School of Medicine, Boston, MA 02118, USA

<sup>3</sup>Department of Medicine, Division of Infectious Diseases, Brigham and Women's Hospital, Boston, MA 02115, USA

<sup>4</sup>Broad Institute of Harvard and MIT, Cambridge, MA, 02142, USA

<sup>5</sup>Massachusetts Consortium on Pathogen Readiness, Boston, MA, 02115, USA

#Correspondence to: [jonathan\\_abraham@hms.harvard.edu](mailto:jonathan_abraham@hms.harvard.edu)

\*equal contributions

48 **Abstract**

49           The SARS-CoV-2 viral spike (S) protein mediates attachment and entry into host cells and  
50 is a major target of vaccine and drug design. Potent SARS-CoV-2 neutralizing antibodies derived  
51 from closely related antibody heavy chain genes (IGHV3-53 or 3-66) have been isolated from  
52 multiple COVID-19 convalescent individuals. These usually contain minimal somatic mutations  
53 and bind the S receptor-binding domain (RBD) to interfere with attachment to the cellular receptor  
54 angiotensin-converting enzyme 2 (ACE2). We used antigen-specific single B cell sorting to isolate  
55 S-reactive monoclonal antibodies from the blood of a COVID-19 convalescent individual. The  
56 seven most potent neutralizing antibodies were somatic variants of the same IGHV3-53-derived  
57 antibody and bind the RBD with varying affinity. We report X-ray crystal structures of four Fab  
58 variants bound to the RBD and use the structures to explain the basis for changes in RBD affinity.  
59 We show that a germline revertant antibody binds tightly to the SARS-CoV-2 RBD and neutralizes  
60 virus, and that gains in affinity for the RBD do not necessarily correlate with increased  
61 neutralization potency, suggesting that somatic mutation is not required to exert robust antiviral  
62 effect. Our studies clarify the molecular basis for a heavily germline-biased human antibody  
63 response to SARS-CoV-2.

64

65

66

67

68

69

70

71

72

## 73 Introduction

74 The SARS-CoV-2 pandemic has caused over 48 million infections with more than 1.2  
75 million deaths worldwide. Vaccines and therapeutic agents are urgently needed, particularly as  
76 certain parts of the world now face new waves of infections. The SARS-CoV-2 spike protein (S)  
77 is a large and heavily glycosylated protein that forms trimers of heterodimers on the surface of  
78 virions. Each S protomer has two functional subunits; S1, which contains a receptor-binding  
79 domain (RBD) that binds to ACE2<sup>1,2</sup>, and S2, which mediates fusion of the viral and host cell  
80 membranes during viral entry.

81 Epitopes for neutralizing antibodies on S include sites on the RBD and on the S1 N-  
82 terminal domain (NTD)<sup>3-8</sup>. IGHV3-53 or IGHV3-66 antibody genes are identical except for a single  
83 amino acid mutation in an antibody framework region (FWR)<sup>9</sup>, and potent SARS-CoV-2  
84 neutralizing antibodies derived from these two germline genes have been isolated from multiple  
85 COVID-19 convalescent individuals<sup>3,4,8,10-13</sup>. The S RBDs can be in “down” or “up”  
86 conformations<sup>14,15</sup>, and ACE2 and IGHV3-53/3-66 neutralizing antibodies can only bind the RBD  
87 when it is “up”<sup>8,16</sup>. Although described IGHV3-53/3-66 neutralizing antibodies have short CDR H3  
88 loops, some IGHV3-53 antibodies with longer CDR H3 loops can make contacts with neighboring  
89 RBDs to close the trimer<sup>17</sup>.

90 Here, we used single B-cell sorting to isolate a panel of monoclonal antibodies that react  
91 against the SARS-CoV-2 S protein from the memory B cells of a COVID-19 convalescent  
92 individual. The most potent neutralizing antibodies were seven somatically related variants of a  
93 single IGVH3-53-derived antibody that binds the RBD with varying affinity. We use X-ray crystal  
94 structures of Fab/SARS-CoV-2 RBD complexes to explain the basis for gains or losses in RBD  
95 affinity that occurred during antibody maturation. We show that a germline revertant of the  
96 antibody binds tightly to the SARS-CoV-2 RBD and that gains affinity for the RBD are not  
97 associated with higher neutralization potency. We propose that such a focused germline-biased

98 antibody to SARS-CoV-2 may be particularly vulnerable to antibody neutralization escape as the  
99 virus continues to circulate in humans.

100

## 101 **Results**

### 102 *Related antibodies dominate the SARS-CoV-2 B-cell response in a convalescent donor*

103 To study neutralizing antibody responses to SARS-CoV-2, we obtained a peripheral blood  
104 sample from a healthy individual (“C1”) who had been infected by SARS-CoV-2 five weeks prior  
105 to sampling. Polyclonal immunoglobulin G (IgG) purified from the blood of this individual  
106 neutralized SARS-CoV-2 but not vesicular stomatitis virus (VSV) lentivirus pseudotype (Fig. 1a).  
107 We generated a soluble SARS-CoV-2 S construct that is stabilized through mutations and the  
108 addition of trimerization tag to adopt the S “pre-fusion” conformation (“S2P”)<sup>14</sup> and used it as an  
109 antigen to isolate 116 memory B cells (CD19<sup>+</sup>, IgG<sup>+</sup>) by FACS (Supplementary Fig. 1a). We could  
110 produce 48 recombinant monoclonal antibodies in sufficient amount for further characterization.  
111 Forty-three of these antibodies bound S2P by ELISA, and 18 also bound the RBD (Supplementary  
112 Fig. 1b and Supplementary Table 1). Most antibodies were derived from the IGHV3 heavy chain  
113 subgroup and had kappa light chains (Fig.1b). Antibody CDR H3 and CDR L3 loops had an  
114 average length of 15 and 9 amino acids, respectively, with low frequencies of somatic  
115 hypermutation in variable heavy and light chain sequences (Fig.1c-d and Supplementary Table  
116 1).

117 Of the 43 antibodies we tested, only eight neutralized SARS-CoV-2 pseudotype with  
118 greater than 90% reduction in entry at a screening concentration of 100  $\mu\text{g ml}^{-1}$  (Supplementary  
119 Fig. 1c). IC<sub>50</sub> values ranged from 0.008 to 0.671  $\mu\text{g ml}^{-1}$  in dose response pseudotype  
120 neutralization assays (Fig. 1e and Supplementary Fig. 2a). These eight antibodies also  
121 neutralized infectious SARS-CoV-2, but authentic virus was more resistant to antibody  
122 neutralization than pseudotype (Fig. 1e and Supplementary Fig. 2b).



123           The only antibodies that neutralized infectious SARS-CoV-2 with an IC<sub>50</sub> value of less than  
124 1 µg ml<sup>-1</sup> – C1A-B3, -F10, -C2, -H5, -C4, -B12, and -H6 – were somatic variants of the same  
125 IGHV3-53/IGKV1-9-derived antibody (Supplementary Table 1). Each had a low number of amino  
126 acid substitutions in the heavy and light chain variable genes (Fig. 1e). Monomeric Fabs derived  
127 from these antibodies bound tightly to the RBD, with affinities ranging from 66 nM to 1 nM (Fig.  
128 1e and Supplementary Fig. 3). C1A-B12, which we used as a representative member of the C1A-  
129 IGHV3 antibodies, prevented an ACE2-Fc fusion protein from binding to the RBD in a biolayer  
130 interferometry (BLI)-based competition assay (Fig. 2a). The Fab of CR3022, a human antibody  
131 that does not compete with ACE2-binding<sup>18</sup>, did not affect C1A-B12 Fab or ACE2-Fc binding to  
132 the RBD (Fig. 2a).

### 133 *Structures of Fab/SARS-CoV-2 RBD complexes*

134           To better understand the effects of somatic mutations on RBD affinity, we determined  
135 X-ray crystal structures of the RBD bound to four Fabs: C1A-B3, -B12, -C2, and -F10 (Fig. 2b).  
136 The Fabs engage the RBD through an identical binding mode with root mean square deviations  
137 (r.m.s.d.) of 0.36-0.39 Å by structural superposition. As with other IGHV3-53/IGHV3-66-derived  
138 antibodies<sup>4,8,10,12,19</sup>, CDR loops H1, H2, H3, and L1 make the majority of RBD contacts (Fig. 2b).  
139 As suggested by the results of competition assays (Fig. 2a), the antibodies and ACE2 bind the  
140 same site on the RBD (Fig. 2c). Most of the contacts are polar and involve backbone and  
141 sidechain atoms on both sides of the interface (Fig. 2d-g). Somatic mutations in the C1A-IGHV3-3  
142 antibodies occurred in CDR loops and FWRs, and in the structure, some (e.g., the F10S and  
143 S14F mutations in the light chain) are positioned far from the RBD and unlikely to impact antigen  
144 affinity (Fig. 3).

145

146

147

148 *Structural basis for affinity maturation of IGHV3-53-derived antibodies*

149 High-resolution X-ray crystal structures of multiple clonotypes allowed us to examine the  
150 effects of somatic mutations on the interaction interface. We also included in our analysis eight  
151 additional IGHV3-53/3-66-derived SARS-CoV-2 neutralizing antibodies isolated in other studies  
152 from multiple donors (B38, CC12.1, CC12.3, CV30, C105, BD-236, and BD-629)<sup>4,8,10,12,19</sup>. These  
153 antibodies have an essentially identical binding mode on the RBD (Supplementary Fig. S4).

154 As examples of mutations at the Fab/RBD interface mutations that likely increase affinity  
155 for the RBD, the V<sub>H</sub> S31N and the S31R mutations, which are found in C1A-C2 and BD-629,  
156 respectively, provide new contacts with RBD Q474 and K458 (Fig. 4a-c). The V<sub>H</sub> S56T mutation,  
157 which occurs in most of the C1A-IGHV3-53 antibodies (Fig. 3), positions a methyl group in van  
158 der Waals contact with RBD T415 and the side chains of Y52 and Y58 on the antibody (Fig. 4d-  
159 e). On the light chain, the N92I substitution creates a new hydrophobic contact with RBD Y505  
160 (Fig. 4g-h). The V<sub>H</sub> T28I somatic mutation, which we did not observe in C1A-IGHV3-53 antibodies,  
161 is probably important as it independently occurred in CV30<sup>19</sup>, B38<sup>4</sup>, and BD-629<sup>8</sup> (Supplementary  
162 Fig. 5a). This change adds a hydrophobic contact with the C $\alpha$  atom of RBD G476 and probably  
163 also helps orient CDR H1 to optimize neighboring polar contacts (Supplementary Fig. 5c-e). The  
164 residue at position 26 in the CDR H1 loop of IGHV3-53/3-66 antibodies is almost uniformly a  
165 glycine, but BD-629 contains a unique substitution (G26E) that provides a new set of polar  
166 contacts with the RBD (Supplementary Fig. 5e).

167 As has been well described in antibody responses to influenza virus and HIV<sup>20,21</sup>, somatic  
168 hypermutation that are not at antibody/antigen interfaces can nevertheless substantially  
169 contribute to affinity gains by influencing CDR loop configuration and flexibility. The V<sub>H</sub> A24V  
170 mutation is a pocket-filling mutation that, through hydrophobic interactions with the side chain of  
171 V<sub>H</sub> F27, would rigidify CDR H1 may “pre-configure” it in a conformation that is compatible with  
172 RBD binding (Fig. 4i-j). V<sub>H</sub> F27 is frequently mutated to a smaller hydrophobic residues during

173 somatic hypermutation; it is replaced by an isoleucine in C1A-H5, BD-604, and BD-236<sup>8</sup>, by a  
174 leucine in CC12.1<sup>12</sup>, and by a valine in CV30<sup>19</sup> (Fig. 4k; Supplementary Fig. 5a and 5c). In contrast  
175 to the V<sub>H</sub> A24V mutation, replacing V<sub>H</sub> F27 with smaller hydrophobic residue would likely make  
176 CDR H1 more flexible as opposed to rigidifying it, and this added flexibility could allow optimization  
177 of local polar contacts, particularly as additional mutations are introduced during affinity  
178 maturation (the T28I change in addition to the F27V mutation in CV30)<sup>19</sup> (Supplementary Fig.  
179 5c).

180 Affinity is not the only property that may be beneficial to an effective antibody response<sup>22</sup>,  
181 and antibody combining site diversity may provide broader protection against pathogens that are  
182 antigenically variable and evolve over time<sup>23</sup>. As examples of BCR diversification that could result  
183 in a loss of RBD affinity, the of V<sub>H</sub> S56A mutation in C1A-B12 removes a polar contact with RBD  
184 D420, and the Y58F mutation in CC12.1 removes a polar contact with the backbone carbonyl of  
185 RBD T415 (Fig. 4f; Supplementary Fig. 5f-g).

186 IGHV3-53/3-66-derived SARS-CoV-2 neutralizing antibodies usually have short CDR H3  
187 loops to avoid clashes with the RBD surface<sup>12</sup> (Supplementary Fig. 4). Six of the seven clonally  
188 related IGHV3-53 antibodies we isolated contain the S100aR mutation in CDR H3 with  
189 independent substitutions at the nucleotide level (Fig. 5a), suggesting that this adaptation was  
190 recurrently selected for during the affinity maturation process. We observed two alternate  
191 conformations for the R100a side chain in the C1A-B12 Fab/RBD structure; it can either contact  
192 the side chain of RBD Q493 or the backbone carbonyl of RBD S494 (Fig. 5b). The R100a side  
193 chain also helps position neighboring antibody residues to make additional contacts with the RBD  
194 as part of a larger network of polar interactions involving water molecules.

### 195 *Germline revertant antibodies neutralize SARS-CoV-2*

196 To better understand the selective pressure driving the expansion of the IGHV3-53 class  
197 of SARS-CoV-2 neutralizing antibodies and the role of the S100aR somatic change in affinity

198 maturation, we generated an antibody revertant in which all positions are reverted to their  
199 germline counterparts (C1A-gl), and another that only retains the S100aR substitution (C1A-gl\*)  
200 (Fig. 3 and Fig. 5c). Monomeric C1A-gl and C1A-gl\* Fabs bound the SARS-CoV-2 S RBD with  
201 affinities of 127 nM and C1A-gl\* and 46 nM, respectively (Fig. 5d and Supplementary Fig. 3). The  
202 effect of the mutation was most pronounced on antibody on-rate, suggesting that the CDR H3  
203 S100aR substitution allows the antibody to more effectively dock onto the RBD. C1A-gl and C1A-  
204 gl\* IgG neutralized infectious SARS-CoV-2 with IC<sub>50</sub> values of 0.126 and 0.102 µg ml<sup>-1</sup>,  
205 respectively (Fig. 4e).

206 We next sought to address whether C1A-IGHV3 antibodies could neutralize SARS-CoV-2  
207 containing the D614G mutation in S, which is found in a circulating SARS-CoV-2 strain with  
208 increased infectivity<sup>24-26</sup>. C1A-gl, which binds the RBD with 126 nM affinity, and C1A-B12, which  
209 binds the RBD with thirty-fold higher affinity (KD of 4 nM), neutralized SARS-CoV-2 S D614G  
210 pseudotypes with comparable IC<sub>50</sub> values (74 and 34 ng ml<sup>-1</sup>, respectively) (Fig. 5f). Taken  
211 together, our results suggest that once a threshold RBD affinity is reached for IGHV3-53  
212 antibodies, gains in affinity are not necessarily associated with more potent virus neutralization.

213

## 214 Discussion

215 In the absence of effective vaccines or therapeutics, the SARS-CoV-2 pandemic has  
216 continued unabated with most of the world now facing new waves of infection despite aggressive  
217 infection control measures. A detailed understanding of the human antibody response to this  
218 novel virus will be required to design safe and effective agents to be used as prophylaxis or early  
219 treatment of SARS-CoV-2 infection, including countermeasures that anticipate changes in the  
220 virus that could lead to antibody neutralization escape. Multiple groups have now reported on  
221 IGHV3-53/3-66-derived antibodies isolated from COVID-19 convalescent donors that carry low  
222 rates of somatic mutation and potently neutralize SARS-CoV-2 – these recognize the RBD with

223 essentially the same binding mode (Supplementary Fig. 4)<sup>3,4,8,10-13</sup>. In the donor we studied, the  
224 neutralizing antibody response was dominated by this class of antibodies (Supplementary Fig. 1  
225 and Supplementary Table 1), suggesting that in certain scenarios, the preponderance of such  
226 antibodies could drive selective evolution of antibody neutralization escape.

227         The high “baseline affinity” IGHV3-53/3-66-derived germline antibodies have for the  
228 SARS-CoV-2 RBD is likely driven by the extensive network of reciprocal polar contacts these  
229 make with both main and side chain atoms of the RBD (Fig. 2, Fig. 3, and Supplementary Fig. 5).  
230 Our ability to detect robust RBD binding for monomeric Fabs representing germline revertant  
231 antibody sequences (Fig. 5) in an assay that does not take into account the avidity that would be  
232 observed with B cell receptors engaging trimeric S suggests that strong selective pressure drives  
233 the evolution of antibody responses against this epitope. Our results stand somewhat in contrast  
234 to those observed with antibody CV30, an IGHV3-53/IGVK3-20 antibody for which reversion of  
235 its only two substitutions ( $V_H$  F27V and T28I) with respect to the germline antibody, results in a  
236 change in affinity from 3.6 nM to 407 nM and in an almost sixty fold change in neutralization  $IC_{50}$   
237 value (from  $0.030 \mu\text{g ml}^{-1}$  to  $16.5 \mu\text{g ml}^{-1}$ )<sup>19</sup>. As described in our analysis, the  $V_H$  F27V and T28I  
238 mutations may respectively affect loop dynamicity and help optimize the geometry of CDR H1  
239 contacts with the RBD<sup>19</sup>. The lack of a drastic change in affinity with reversion of germline antibody  
240 sequences with C1A-IGHV3-53 antibodies suggest that these take better advantage of antigen  
241 complementarity afforded by their CDR H3 loop and light chain gene (IGVK1-9 for C1A-IGHV3-  
242 53 antibodies and IGVK3-20 for CV30) (Supplementary Fig. 4).

243         While we did not observe a correlation between RBD affinity and virus neutralization, we  
244 did not measure affinities with full length SARS-CoV-2 S. IGHV3-53/3-66 neutralizing antibodies  
245 can only bind the RBD when it is “up”<sup>8,16</sup>, and efficient virus neutralization by engagement of an  
246 epitope that is transiently exposed likely requires optimization of binding on- and off-rates in  
247 addition to gains in overall affinity.

248 Mutations that allow SARS-CoV-2 S to escape neutralization by antibodies that compete  
249 with ACE2 binding have been observed *in vitro*<sup>27</sup> and recently in circulating strains<sup>28</sup>. Although  
250 SARS-CoV-2 encodes an exonuclease that increases the fidelity of replication of its large RNA  
251 genome, recurrence of an identical antibody response in multiple COVID-19 convalescent  
252 individuals suggests that selective pressure against the RBD-binding site for ACE2 is substantial.  
253 To broadly protect against emerging S variants and to counter evolution of neutralization escape  
254 over time as the virus circulates in humans, vaccine design efforts may need to focus on potent  
255 neutralizing antibodies binding additional sites on SARS-CoV-2 S, rather than on clonal expansion  
256 of one or a limited set of IGHV3-53/3-66-derived antibodies, as occurred during natural infection  
257 of the convalescent donor we studied.

258

## 259 **Methods**

### 260 **Donors**

261 This study was approved by the Harvard Medical School Office of Human Research  
262 Administration Institutional Review Board (IRB20-0365) as was the use of healthy donor control  
263 blood (IRB19-0786). We received informed, written consent from a healthy adult male participant  
264 (C1) who recovered from confirmed SARS2-CoV-2 infection, with mild illness not requiring  
265 hospitalization, five weeks before blood donation. We isolated C1 and control donor PBMCs by  
266 Ficoll-Plaque (GE Healthcare) density centrifugation.

267

### 268 **Single B cell sorting and antibody cloning**

269 We stained and sorted single memory B cells as previously described<sup>29</sup> using a MoFlo Astrios EQ  
270 Cell Sorter (Beckman Coulter). Briefly, we enriched B cells by incubating PBMCs with anti-CD20  
271 MicroBeads (Miltenyi Biotec) followed by magnetic separation on a MACS LS column (Miltenyi  
272 Biotec) according to the manufacturer's instructions. We washed, counted, and resuspended the

273 B cells in phosphate buffered saline (PBS) containing 2% (v/v) FBS. We adjusted the B cells to a  
274 density of  $1 \times 10^7$  cells and incubated cells with biotinylated SARS CoV-2 spike (S2P) at a  
275 concentration of  $5 \mu\text{g ml}^{-1}$  on ice for 30 min. After washing three times and resuspending the cells,  
276 we added anti-IgG-APC antibody (BD Biosciences), anti-CD19-FITC antibody (BD Biosciences),  
277 and streptavidin-PE (Invitrogen). After incubating the cells on ice for 30 min, we washed cells  
278 three times in PBS containing 2% (v/v) FBS and passed the suspension through a cell strainer  
279 before sorting.

280

281 We performed single cell cDNA synthesis using SuperScript<sup>TM</sup> III reverse transcriptase  
282 (Invitrogen) followed by nested PCR amplification to obtain the IgH, Ig $\lambda$ , and IgK variable  
283 segments from memory B cells as previously described<sup>30</sup>. We used IMGT/V-QUEST<sup>31</sup>  
284 (<http://www.imgt.org>) to analyze IgG gene usage and the extent of variable segment somatic  
285 hypermutation. The variable segments were cloned into the pVRC8400 vector for expression of  
286 the IgG and Fab constructs as previously described<sup>32</sup>.

287

## 288 **Cells and viruses**

289 We maintained HEK293T cells (ATCC CRL-11268) in Dulbecco's Modified Eagle's Medium  
290 (DMEM) supplemented with 10% (v/v) fetal bovine serum (FBS) and 1% (v/v) penicillin-  
291 streptomycin and Expi293F<sup>TM</sup> cells (Thermo Fisher Scientific) in Expi293<sup>TM</sup> expression medium  
292 (Gibco) supplemented with 1% (v/v) penicillin-streptomycin. A HEK293T-hACE2 stable cell line  
293 was a gift from Huihui Mou and Michael Farzan and an Expi293F-His<sub>6</sub>-tagged SARS-CoV-2 S2P  
294 stable cell line that expresses a gift from Bing Chen. We maintained these in the same media with  
295 the addition of  $1 \mu\text{g ml}^{-1}$  puromycin. We maintained HEK293T cells grown in suspension in  
296 FreeStyle 293 Expression Medium (Gibco) and HEK293S GnTI<sup>-/-</sup> cells (ATCC CRL-3022) in  
297 Freestyle 293 Expression Medium supplemented with 2% ultra-low IgG FBS (Gibco). We  
298 maintained, was maintained in adherent culture with DMEM supplemented with 1% (v/v)



299 GlutaMax (Gibco), 1% (v/v) penicillin-streptomycin, 10% (v/v) FBS and  $1\mu\text{g ml}^{-1}$  puromycin. The  
300 cell line was then adapted to suspension culture and maintained in Expi293<sup>TM</sup> expression medium  
301 supplemented with 1% (v/v) penicillin-streptomycin and  $1\mu\text{g ml}^{-1}$  puromycin (Gibco).  
302 Passage 4 SARS-CoV-2 USA/WA1/2020<sup>33</sup> was received from the University of Texas Medical  
303 Branch. A T225 flask of VeroE6 cells was inoculated with 90  $\mu\text{l}$  starting material in 15 ml DMEM  
304 containing 2% (v/v) of heat inactivated FBS (HI-FBS) and incubated in a humidified incubator at  
305 37 °C with periodic rocking for 1 h. After 1 h, 60 ml of DMEM / 2% (v/v) HI-FBS was added without  
306 removing the inoculum and incubated again at 37 °C. The flask was observed daily for progression  
307 of cytopathic effect and stock was harvested at 66 h post-inoculation. Stock supernatant was  
308 harvested and clarified by centrifugation at 5,250 relative centrifugal field (RCF) at 4°C for 10 min  
309 and the HI-FBS concentration was increased to 10% (v/v) final concentration.

310

### 311 **Protein production**

312 For single B cell sorting we cloned a construct for SARS-CoV-2 S (GenBank ID: QHD43416.1  
313 residues 16-1208) with a “GSAS” substitution at the furin cleavage site (residues 682-685),  
314 stabilized in the prefusion conformation through proline substitutions at residues 986 and 987<sup>14</sup>,  
315 and a C-terminal foldon trimerization motif followed by a BirA ligase site, a Tobacco Etch Virus  
316 (TEV) protease site, a FLAG tag, and a His<sub>6</sub>-tag into a pHLsec vector<sup>34</sup>, which contains its own  
317 secretion signal sequence. We note that two N-terminal S residues (residues 14 and 15)  
318 downstream of the native S signal peptide were inadvertently omitted from the S2P construct  
319 during subcloning. We transfected Expi293F<sup>TM</sup> cells using an ExpiFectamine<sup>TM</sup> transfection kit  
320 (Thermo Fisher Scientific) according to the manufacturer’s protocol. We purified the protein using  
321 anti-FLAG M2 Affinity Gel (Sigma) according to manufacturer’s protocol and removed the FLAG  
322 tag and His<sub>6</sub>-tag with TEV digestion followed by reverse nickel affinity purification and size-  
323 exclusion chromatography on a Superose 6 Increase column (GE Healthcare Life Sciences). We  
324 biotinylated the protein with BirA ligase as previously described<sup>32</sup>.



325

326 To obtain recombinant S2P for ELISAs, we used Ni Sepharose<sup>®</sup> Excel (GE Healthcare Life  
327 Sciences) to purify His<sub>6</sub>-tagged SARS-CoV-2 S2P from the supernatant of Expi293F cells stably  
328 expressing this protein. We further purified the protein using size exclusion chromatography on a  
329 Superpose 6 Increase column.

330

331 We expressed and purified recombinant monoclonal antibodies and Fab fragments using the  
332 pVRC8400 vector as previously described<sup>32</sup>. To generate the CR3022 control Fab, we amplified  
333 its variable heavy chain and light chain gene regions (GenBank IDs: DQ168569.1 and  
334 DQ168570.1) from cDNA (a gift from Galit Alter) and subcloned these into the pVRC8400 vector.  
335 We used size exclusion chromatography on a Superdex 200 Increase column (S200, GE  
336 Healthcare Life Sciences) for all Fabs, which eluted as single peaks at the expected retention  
337 volume.

338

339 We subcloned constructs for the SARS-CoV-2 S RBD (GenBank ID: QHD43416.1 residues 319-  
340 541) into the pHLsec<sup>34</sup> vector for use in ELISAs, BLI binding studies, and X-ray crystallography.  
341 For ELISAs and crystallography the construct includes an N-terminal His<sub>6</sub>-tag, a TEV protease  
342 site and a short linker (amino acids SGSG). For BLI-binding assays, the construct includes an N-  
343 terminal His<sub>6</sub>-tag, followed by a TEV protease site, a BirA ligase site, and a 7-residue linker. We  
344 produced protein for ELISA and BLI-binding assays by using linear polyethylenimine (PEI) to  
345 transfect HEK293T cells grown in suspension and purified by nickel affinity purification. For BLI-  
346 binding assays the protein was digested with TEV protease to remove the His<sub>6</sub>-tag followed by  
347 reverse nickel affinity purification. We biotinylated protein with BirA ligase as previously  
348 described<sup>35</sup>, followed by a reverse nickel affinity purification step to remove BirA ligase, which  
349 contains a His<sub>6</sub>-tag and cannot be separated by size exclusion chromatography from the SARS-  
350 CoV-2 RBD due to its similar size. For crystallography, we produced the protein by PEI

351 transfection of GnTI<sup>-/-</sup> HEK293S cells grown in suspension or HEK293T cells grown in suspension  
352 and also in presence of kifunensine (5  $\mu$ M), purified by nickel affinity purification, and removed  
353 the His<sub>6</sub>-tag by TEV digestion followed by reverse nickel affinity purification. As a final step, we  
354 used size exclusion on a S200 Increase column, in which each recombinant RBD protein ran as  
355 a single peak at the expected retention volume.

356  
357 We subcloned the ectodomain of human ACE2 (GenBank ID: BAB40370.1 residues 18-740, with  
358 cDNA obtained as a gift cDNA from Michael Farzan, with a C-terminal Fc tag into a pVRC8400  
359 vector containing human IgG1 Fc (a gift from Aaron Schmidt). We expressed the protein in  
360 Expi293F<sup>TM</sup> cells using an ExpiFectamine<sup>TM</sup> transfection kit according to the manufacturer's  
361 protocol, and purified the protein using MabSelect SuRE Resin using the manufacturer's protocol,  
362 followed by size exclusion chromatography on a Superose 6 Increase column, with the protein  
363 eluting at the expected retention volume.

364

### 365 **Crystallization**

366 We prepared each Fab:SARS-CoV-2 RBD complex by mixing RBD with 1.5 molar excess of Fab.  
367 The mixtures were incubated at 4°C for 1 h prior to purification on a Superdex 200 Increase SEC  
368 column (GE Healthcare Life Sciences) in buffer containing 150mM NaCl, 25 mM Tris-HCl, pH 7.5.  
369 Each complex co-eluted as a single peak at expected retention volume. We adjusted the  
370 concentration of each complex to 13 mg ml<sup>-1</sup> and screened for crystallization conditions in hanging  
371 drops containing 0.1  $\mu$ l of protein and 0.1 $\mu$ l of mother liquor using a Mosquito protein  
372 crystallization robot (SPT Labtech) with commercially available screens (Hampton Research) (see  
373 Key Resources Table). Crystals grew within 24 h for the C1A-B12 Fab:RBD complex in 0.1 M  
374 BICINE pH 8.5, 20% (w/v) polyethylene glycol 10,000, for the C1A-B3 Fab:RBD complex in 0.2  
375 M Ammonium phosphate dibasic, 20% (w/v) polyethylene glycol 3,350; for the C1A-C2 Fab:RBD  
376 complex in 0.03 M citric acid, 0.07M BIS-TRIS propane pH 7.6, 20% (w/v) polyethylene glycol

377 3,350, and for C1A-F10 Fab:RBD complex in 0.10% (w/v) n-Octyl-B-glucoside, 0.1 M Sodium  
378 citrate tribasic dihydrate pH 4.5, and 22% (w/v) polyethylene glycol 3,350.

379

### 380 **Structure determination**

381 All crystals were flash frozen in mother liquor supplemented with 15% (v/v) glycerol as  
382 cryoprotectant. We collected single crystal X-ray diffraction data on Eiger X 16M pixel detectors  
383 (Dectris) at a wavelength of 0.979180 Å at the Advanced Photon Source (APS, Argonne, IL) NE-  
384 CAT beamline 24-ID-E for the C1A-B12 Fab:RBD and C1A-B3 Fab:RBD complexes and NE-CAT  
385 beamline 24-ID-C for the C1A-C2 Fab:RBD and C1A-F10 Fab:RBD complexes. Diffraction data  
386 were indexed and integrated using XDS (build 202 00131)<sup>36</sup> and merged using AIMLESS  
387 (v0.5.32)<sup>37</sup>. The structure of C1A-B12 Fab:RBD (space group  $P2_12_12_1$ ) was determined by  
388 molecular replacement using Phaser (v2.8.3)<sup>38</sup>, with coordinates for the B38 Fab variable domain,  
389 constant domain and RBD (PDB ID: 7BZ5) (Wu et al., 2020) used as search models. Three copies  
390 were found in the asymmetric unit (ASU). We performed iterative model using O<sup>39</sup> and refinement  
391 in Phenix (v1.18.2-3874)<sup>40</sup> and Buster (v2.10.3)<sup>41</sup>, during which we also built alternative  
392 conformations where density was apparent. During refinements, we updated TLS groups  
393 calculated using Phenix<sup>40</sup> and a python script, as well as occupancy restraints calculated in  
394 Buster. During model building, we also customized geometry restraints to prevent large  
395 displacement of unambiguous contacts in poor regions; the restraints were released once  
396 refinements became stable. Water molecules were automatically picked and updated in Buster,  
397 followed by manual examination and adjustment till late stage refinement. The structures of C1A-  
398 B3:RBD (space group  $P2_12_12_1$ , 3 copies per ASU), C1A-C2:RBD (space group  $C222_1$ , 1 copy per  
399 ASU) and C1A-F10:RBD (space group  $C222_1$ , 1 copy per ASU) were determined using RBD and  
400 the C1A-B12 Fab variable and constant domains as search ensembles with CDR and flexible  
401 loops truncated, with iterative model building and refinement as described above. Data collection,  
402 processing and refinement statistics are summarized in Figure S2.

403

## 404 **Structural Analysis**

405 We analyzed the structures and generated figures using PyMOL (Schrödinger).

406

## 407 **Lentivirus pseudotype production**

408 The SARS-CoV-2 S protein (Genbank ID: QJR84873.1 residues 1-1246) with a modified  
409 cytoplasmic sequence that includes HIV gp41 residues (NRVRQGYS) replacing C-terminal  
410 residues 1247-1273 of the S protein (gift from Nir Hacohen) was subcloned into the pCAGGS  
411 expression vector. We used Gibson assembly to generate the S D614G mutant. A pCAGGS  
412 expressor plasmid for VSV G was previously described<sup>42</sup>. To package lentivirus, we co-  
413 transfected HEK293T cells using lipofectamine<sup>TM</sup> 3000 (Thermo Fisher Scientific) with an  
414 envelope gene-encoding pCAGGS vector, a packaging vector containing HIV Gag, Pol, Rev, and  
415 Tat (psPAX2, provided by Didier Trono, Addgene #12260), and a transfer vector containing GFP  
416 (lentiCas9-EGFP, a gift from Phillip Sharp and Feng Zhang, Addgene #63592)<sup>43</sup> in which we  
417 deleted Cas9. After 18 h, we changed the supernatant to DMEM containing 2 % FBS (v/v). We  
418 harvested supernatants after 48 and 72 h, centrifuged at 3000 x g for 5 min, and filtered the  
419 supernatants through a 0.45 µm filter. To concentrate lentivirus pseudotypes, we layered the  
420 supernatant on top of a 10% (v/v) sucrose cushion in 50 mM Tris-HCl pH 7.5, 100 mM NaCl, 0.5  
421 mM EDTA and spun samples at 10,000 x g for 4 h at 4 °C. We removed supernatants and  
422 resuspended virus pellets in Opti-MEM containing 5% (v/v) FBS and stored these at -80 °C.

423

## 424 **Pseudotype neutralization experiments**

425 We purified polyclonal IgG from human plasma samples using Pierce<sup>TM</sup> Protein G Ultra Link<sup>TM</sup>  
426 Resin (Thermo Fisher Scientific) following the manufacturer's protocol. We pre-incubated  
427 polyclonal serum IgG or monoclonal antibodies at a concentration with SARS-CoV-2 or VSV G  
428 lentivirus pseudotypes in the presence of 0.5 µg ml<sup>-1</sup> of polybrene for 1 h minutes at 37 °C. Virus

429 antibody mixtures were added to HEK293T-hACE2 with incubation on cells at 37 °C for 24 h, and  
430 the media replaced with DMEM containing 10% (v/v) FBS, 1% (v/v) penicillin-streptomycin (v/v),  
431 and 1 µg ml<sup>-1</sup> puromycin. We determined the percent of GFP positive cells by FACS with an iQue  
432 Screener PLUS (Intellicyt) 48 h after initial infection. We calculated percent relative entry by using  
433 the following equation: Relative Entry (%) = (% GFP positive cells in antibody well)/(%GFP  
434 positive cells in no antibody control). We calculated percent neutralization using the following  
435 equation: Neutralization (%) = 1 - (% GFP positive cells in nanobody well)/(% GFP positive cells  
436 in PBS alone well).

437

### 438 **Live virus PRNT experiments**

439 Monoclonal antibody samples were serially diluted in Dulbecco's Phosphate-Buffered Saline  
440 (DPBS, Gibco) using half-log dilutions starting at a concentration of 50 µg ml<sup>-1</sup>. Dilutions were  
441 prepared in triplicate for each sample and plated in triplicate. Each dilution was incubated at 37  
442 °C for 1 h with 1,000 plaque-forming units ml<sup>-1</sup> (PFU ml<sup>-1</sup>) of SARS-CoV-2 (isolate USA-  
443 WA1/2020). 200 µl of each dilution was added to the confluent monolayers of NR-596 Vero E6  
444 cells (ATCC) in triplicate and incubated in a 5% CO<sub>2</sub> incubator at 37 °C for 1 hour. The cells were  
445 rocked gently every 15 min to prevent monolayer drying. Cells were then overlaid with a 1:1  
446 solution of 2.5% (v/v) Avicel® RC-591 microcrystalline cellulose and carboxymethylcellulose  
447 sodium (DuPont Nutrition & Biosciences) and 2x Modified Eagle Medium (MEM - Temin's  
448 modification, Gibco) supplemented with 100 X antibiotic-antimycotic (Gibco) and 100X GlutaMAX  
449 (Gibco) both to a final concentration of 2X, and 10% (v/v) FBS (Gibco). The plates were then  
450 incubated at 37 °C for 2 d. After two days, the monolayers were fixed with 10% (v/v) neutral  
451 buffered formalin for at least 6 h (NBF, Sigma-Aldrich) and stained with 0.2% (v/v) aqueous  
452 Gentian Violet (RICCA Chemicals) in 10% (v/v) neutral buffered formalin for 30 min, followed by  
453 rinsing and plaque counting.

454

455 **ELISA experiments**

456 We coated NUNC Maxisorp plates (Thermo Fisher Scientific) with His<sub>6</sub>-tagged SARS-CoV-2 S2P,  
457 SARS-CoV-2 RBD, or LUJV GP1 in PBS overnight at 4 °C, followed by a blocking step with PBS  
458 containing 3% (v/v) BSA 0.02% (v/v) Tween. We incubated monoclonal antibodies at a  
459 concentration of 100 µg ml<sup>-1</sup> for one hour. We detected bound antibody with horseradish  
460 peroxidase (HRP)-coupled anti-human (Fc) antibody (Sigma Aldrich catalog number A0170).

461

462 **Biolayer interferometry assays**

463 We performed BLI experiments with an Octet RED96e (Sartorius). For affinity measurements,  
464 biotinylated SARS-CoV-2 RBD was loaded onto a streptavidin (SA) sensor (ForteBio) at 1.5 µg  
465 ml<sup>-1</sup> in kinetic buffer (PBS containing 0.02% Tween and 0.1% BSA) for 100 s. After a baseline  
466 measurement for 60 s in kinetic buffer, antibody Fabs were associated for 300 s followed by a  
467 300 s dissociation step.

468 For ACE2-Fc competition experiments, we loaded biotinylated SARS-CoV-2 RBD onto SA  
469 sensors (ForteBio) at 1.5 µg ml<sup>-1</sup> for 80 s. We associated C1A-B12 Fab or CR3022-Fab at 250  
470 nM or buffer for 180 s followed by an association with ACE2-Fc or CR3022 Fab at a concentration  
471 of 250 nM for 180 s. We allowed complexes to dissociate for 180 s.

472

473 **Author contributions**

474 Conceptualization, S.A.C, L.E.C, J.P., A.C.; Investigation, S.A.C., L.E.C., J.P., A.C., L.G.A.M.,  
475 S.S., R.I.J., A.G., J.A.; Writing, original draft: J.A.; Writing – Review and editing, S.A.C., L.E.C.,  
476 J.P., A.C., L.G.A.M., S.S., R.I.J., A.G., J.A.; Funding acquisition, JA.

477

478

479

480

481 **Acknowledgements**

482 This work is based upon research conducted at the Northeastern Collaborative Access Team  
483 (NE-CAT) beamlines, which are funded by the National Institute of General Medical Sciences  
484 from the National Institutes of Health (P30 GM124165). The Pilatus 6M detector on 24-ID-C beam  
485 line is funded by a NIH-ORIP HEI grant (S10 RR029205). This research used resources of the  
486 Advanced Photon Source, a U.S. Department of Energy (DOE) Office of Science User Facility  
487 operated for the DOE Office of Science by Argonne National Laboratory under Contract No. DE-  
488 AC02-06CH11357. We thank the staff at NE-CAT for assistance with X-ray data collection.  
489 Funding was provided by the Massachusetts Consortium on Pathogen Readiness (MassCPR)  
490 and the China Evergrande Group (J.A.). We thank Bing Chen for providing a SARS-CoV-2 S2P  
491 expressing stable cell line and Michael Farzan and Huihui Mou for providing HEK293T-hACE2  
492 cells. We also thank Lindsey Baden, Michael Mina, and Brendan Blumenstiel for help with sample  
493 acquisition and SARS-CoV-2 testing.

494 **Data availability**

495 All relevant data are available from the authors upon request. Protein Data Bank (PDB)  
496 identification numbers for the C1A-B3/RBD, C1A-F10/RBD, C1A-C2/RBD, and C1A-B12 RBD  
497 complexes are 7KFW, 7KFY, 7KFX, and 7KFV, respectively.

498

499 **Competing interests**

500 S.A.C., L.E.C., and J.A. are inventors on a provisional patent application filed by Harvard  
501 University that includes antibodies reported in this work.

502

503

504

505

506

507

508

509



## 510 References

- 511
- 512 1 Zhou, P. *et al.* A pneumonia outbreak associated with a new coronavirus of probable bat  
513 origin. *Nature*, 270–273, doi:10.1038/s41586-020-2012-7 (2020).
- 514 2 Hoffmann, M. *et al.* SARS-CoV-2 Cell Entry Depends on ACE2 and TMPRSS2 and Is  
515 Blocked by a Clinically Proven Protease Inhibitor. *Cell*, 271-280.e278,  
516 doi:10.1016/j.cell.2020.02.052 (2020).
- 517 3 Robbiani, D. F. *et al.* Convergent antibody responses to SARS-CoV-2 in convalescent  
518 individuals. *Nature*, 437-442, doi:10.1038/s41586-020-2456-9 (2020).
- 519 4 Wu, Y. *et al.* A noncompeting pair of human neutralizing antibodies block COVID-19  
520 virus binding to its receptor ACE2. *Science*, 1274-1278, doi:10.1126/science.abc2241  
521 (2020).
- 522 5 Hansen, J. *et al.* Studies in humanized mice and convalescent humans yield a SARS-  
523 CoV-2 antibody cocktail. *Science*, 1010-1014, doi:10.1126/science.abd0827 (2020).
- 524 6 Chi, X. *et al.* A neutralizing human antibody binds to the N-terminal domain of the Spike  
525 protein of SARS-CoV-2. *Science* **369**, 650-655, doi:10.1126/science.abc6952 (2020).
- 526 7 Liu, L. *et al.* Potent neutralizing antibodies against multiple epitopes on SARS-CoV-2  
527 spike. *Nature*, 450–456, doi:10.1038/s41586-020-2571-7 (2020).
- 528 8 Du, S. *et al.* Structurally Resolved SARS-CoV-2 Antibody Shows High Efficacy in  
529 Severely Infected Hamsters and Provides a Potent Cocktail Pairing Strategy. *Cell*,  
530 doi:10.1016/j.cell.2020.09.035 (2020).
- 531 9 Lefranc, M.-P. & Lefranc, G. The Immunoglobulin FactsBook. (2014).
- 532 10 Shi, R. *et al.* A human neutralizing antibody targets the receptor-binding site of SARS-  
533 CoV-2. *Nature* **584**, 120-124, doi:10.1038/s41586-020-2381-y (2020).
- 534 11 Rogers, T. F. *et al.* Isolation of potent SARS-CoV-2 neutralizing antibodies and  
535 protection from disease in a small animal model. *Science*, 956-963,  
536 doi:10.1126/science.abc7520 (2020).
- 537 12 Yuan, M. *et al.* Structural basis of a shared antibody response to SARS-CoV-2. *Science*,  
538 1119-1123, doi:10.1126/science.abd2321 (2020).
- 539 13 Seydoux, E. *et al.* Analysis of a SARS-CoV-2-Infected Individual Reveals Development  
540 of Potent Neutralizing Antibodies with Limited Somatic Mutation. *Immunity* **53**, 98-105  
541 e105, doi:10.1016/j.immuni.2020.06.001 (2020).
- 542 14 Wrapp, D. *et al.* Cryo-EM structure of the 2019-nCoV spike in the prefusion  
543 conformation. *Science* **367**, 1260-1263, doi:10.1126/science.abb2507 (2020).
- 544 15 Walls, A. C. *et al.* Structure, Function, and Antigenicity of the SARS-CoV-2 Spike  
545 Glycoprotein. *Cell*, 281-292.e286, doi:10.1016/j.cell.2020.02.058 (2020).
- 546 16 Barnes, C. O. *et al.* Structures of Human Antibodies Bound to SARS-CoV-2 Spike  
547 Reveal Common Epitopes and Recurrent Features of Antibodies. *Cell* **182**, 828-842  
548 e816, doi:10.1016/j.cell.2020.06.025 (2020).
- 549 17 Barnes, C. O. *et al.* SARS-CoV-2 neutralizing antibody structures inform therapeutic  
550 strategies. *Nature*, doi:10.1038/s41586-020-2852-1 (2020).
- 551 18 Yuan, M. *et al.* A highly conserved cryptic epitope in the receptor binding domains of  
552 SARS-CoV-2 and SARS-CoV. *Science* **368**, 630-633, doi:10.1126/science.abb7269  
553 (2020).
- 554 19 Hurlburt, N. K. *et al.* Structural basis for potent neutralization of SARS-CoV-2 and role of  
555 antibody affinity maturation. *bioRxiv*, 2020.2006.2012.148692,  
556 doi:10.1101/2020.06.12.148692 (2020).
- 557 20 Schmidt, A. G. *et al.* Preconfiguration of the antigen-binding site during affinity  
558 maturation of a broadly neutralizing influenza virus antibody. *Proc Natl Acad Sci U S A*  
559 **110**, 264-269, doi:10.1073/pnas.1218256109 (2013).



- 560 21 Klein, F. *et al.* Somatic mutations of the immunoglobulin framework are generally  
561 required for broad and potent HIV-1 neutralization. *Cell* **153**, 126-138,  
562 doi:10.1016/j.cell.2013.03.018 (2013).
- 563 22 Eisen, H. N. Affinity enhancement of antibodies: how low-affinity antibodies produced  
564 early in immune responses are followed by high-affinity antibodies later and in memory  
565 B-cell responses. *Cancer Immunol Res* **2**, 381-392, doi:10.1158/2326-6066.CIR-14-0029  
566 (2014).
- 567 23 McCarthy, K. R., Raymond, D. D., Do, K. T., Schmidt, A. G. & Harrison, S. C. Affinity  
568 maturation in a human humoral response to influenza hemagglutinin. *Proc Natl Acad Sci*  
569 *U S A*, doi:10.1073/pnas.1915620116 (2019).
- 570 24 Korber, B. *et al.* Tracking Changes in SARS-CoV-2 Spike: Evidence that D614G  
571 Increases Infectivity of the COVID-19 Virus. *Cell* **182**, 812-827 e819,  
572 doi:10.1016/j.cell.2020.06.043 (2020).
- 573 25 Zhang, L. *et al.* The D614G mutation in the SARS-CoV-2 spike protein reduces S1  
574 shedding and increases infectivity. *bioRxiv*, doi:10.1101/2020.06.12.148726 (2020).
- 575 26 Yurkovetskiy, L. *et al.* Structural and Functional Analysis of the D614G SARS-CoV-2  
576 Spike Protein Variant. *Cell*, 739-751.e738, doi:10.1016/j.cell.2020.09.032 (2020).
- 577 27 Baum, A. *et al.* Antibody cocktail to SARS-CoV-2 spike protein prevents rapid mutational  
578 escape seen with individual antibodies. *Science*, 1014-1018,  
579 doi:10.1126/science.abd0831 (2020).
- 580 28 Thomson, E. C. *et al.* The circulating SARS-CoV-2 spike variant N439K maintains  
581 fitness while evading antibody-mediated immunity. *bioRxiv*, 2020.2011.2004.355842,  
582 doi:10.1101/2020.11.04.355842 (2020).
- 583 29 Scheid, J. F. *et al.* A method for identification of HIV gp140 binding memory B cells in  
584 human blood. *J Immunol Methods* **343**, 65-67, doi:10.1016/j.jim.2008.11.012 (2009).
- 585 30 Scheid, J. F. *et al.* Sequence and structural convergence of broad and potent HIV  
586 antibodies that mimic CD4 binding. *Science* **333**, 1633-1637,  
587 doi:10.1126/science.1207227 (2011).
- 588 31 Brochet, X., Lefranc, M. P. & Giudicelli, V. IMGT/V-QUEST: the highly customized and  
589 integrated system for IG and TR standardized V-J and V-D-J sequence analysis. *Nucleic*  
590 *Acids Res* **36**, W503-508, doi:10.1093/nar/gkn316 (2008).
- 591 32 Clark, L. E. *et al.* Vaccine-elicited receptor-binding site antibodies neutralize two New  
592 World hemorrhagic fever arenaviruses. *Nat Commun* **9**, 1884, doi:10.1038/s41467-018-  
593 04271-z (2018).
- 594 33 Harcourt, J. *et al.* Severe Acute Respiratory Syndrome Coronavirus 2 from Patient with  
595 Coronavirus Disease, United States. *Emerg Infect Dis* **26**, 1266-1273,  
596 doi:10.3201/eid2606.200516 (2020).
- 597 34 Aricescu, A. R., Lu, W. & Jones, E. Y. A time- and cost-efficient system for high-level  
598 protein production in mammalian cells. *Acta Crystallogr D Biol Crystallogr* **62**, 1243-  
599 1250, doi:10.1107/S0907444906029799 (2006).
- 600 35 Mahmutovic, S. *et al.* Molecular Basis for Antibody-Mediated Neutralization of New  
601 World Hemorrhagic Fever Mammarenaviruses. *Cell Host Microbe* **18**, 705-713,  
602 doi:10.1016/j.chom.2015.11.005 (2015).
- 603 36 Kabsch, W. Xds. *Acta Crystallogr D Biol Crystallogr* **66**, 125-132,  
604 doi:10.1107/S0907444909047337 (2010).
- 605 37 Evans, P. R. & Murshudov, G. N. How good are my data and what is the resolution?  
606 *Acta Crystallogr D Biol Crystallogr* **69**, 1204-1214, doi:10.1107/S0907444913000061  
607 (2013).
- 608 38 McCoy, A. J. *et al.* Phaser crystallographic software. *J Appl Crystallogr* **40**, 658-674,  
609 doi:10.1107/S0021889807021206 (2007).

610 39 Jones, T. A., Zou, J. Y., Cowan, S. W. & Kjeldgaard, M. Improved methods for building  
611 protein models in electron density maps and the location of errors in these models. *Acta*  
612 *Crystallogr A* **47 ( Pt 2)**, 110-119, doi:10.1107/s0108767390010224 (1991).  
613 40 Adams, P. D. *et al.* PHENIX: a comprehensive Python-based system for macromolecular  
614 structure solution. *Acta Crystallogr D Biol Crystallogr* **66**, 213-221,  
615 doi:10.1107/S09074444909052925 (2010).  
616 41 Bricogne, G. *et al.* *BUSTER version 2.10.3.*, (Global Phasing Ltd., 2017).  
617 42 Radoshitzky, S. R. *et al.* Transferrin receptor 1 is a cellular receptor for New World  
618 haemorrhagic fever arenaviruses. *Nature* **446**, 92-96, doi:10.1038/nature05539 (2007).  
619 43 Chen, S. *et al.* Genome-wide CRISPR screen in a mouse model of tumor growth and  
620 metastasis. *Cell* **160**, 1246-1260, doi:10.1016/j.cell.2015.02.038 (2015).  
621 44 Lan, J. *et al.* Structure of the SARS-CoV-2 spike receptor-binding domain bound to the  
622 ACE2 receptor. *Nature* **581**, 215-220, doi:10.1038/s41586-020-2180-5 (2020).  
623 45 Robert, X. & Gouet, P. Deciphering key features in protein structures with the new  
624 ENDscript server. *Nucleic Acids Res* **42**, W320-324, doi:10.1093/nar/gku316 (2014).  
625 46 Zhang, Q. *et al.* Cellular Nanosponges Inhibit SARS-CoV-2 Infectivity. *Nano Lett* **20**,  
626 5570-5574, doi:10.1021/acs.nanolett.0c02278 (2020).  
627  
628  
629  
630  
631  
632  
633  
634  
635  
636  
637  
638  
639

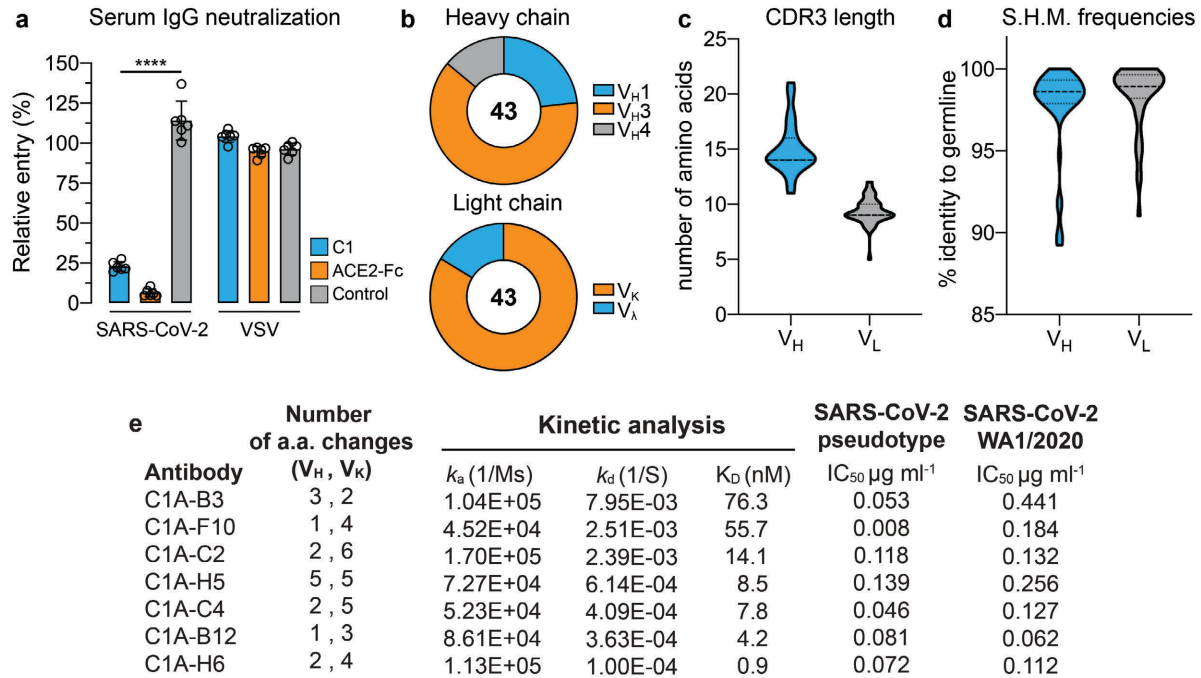

640

641 **Figure 1. S-reactive monoclonal antibodies from a COVID-19 convalescent individual.** (a) Entry  
 642 levels of SARS-CoV-2 or vesicular stomatitis virus (VSV) pseudotypes after pre-incubation with  
 643 polyclonal IgG purified from the plasma of a COVID-19 convalescent individual (“C1”), a non-immune  
 644 control donor (“control”), or with an ACE2-Fc fusion protein. Data are normalized to a no antibody  
 645 control. Means ± standard deviation from two experiments performed in triplicate (n=6). One-way  
 646 ANOVA with Tukey’s multiple comparisons test. \*\*\*\**P* < 0.0001. (b) Antibody heavy and light chain  
 647 gene usage for SARS-CoV-2 S-reactive monoclonal antibodies. (c-d) Violin plots showing CDR3 loop  
 648 lengths and somatic hypermutation frequencies (S.H.M.) for S-reactive monoclonal antibodies. The  
 649 median and quartiles are shown as dashed and dotted lines, respectively. For CDR3 loop lengths, the  
 650 median and first quartile marker overlap. (e) Properties of the seven IGHV3-53-derived potent SARS-  
 651 CoV-2 neutralizing antibodies. a.a.: amino acids. WA1/2020: SARS-CoV-2 strain USA/WA1/2020.

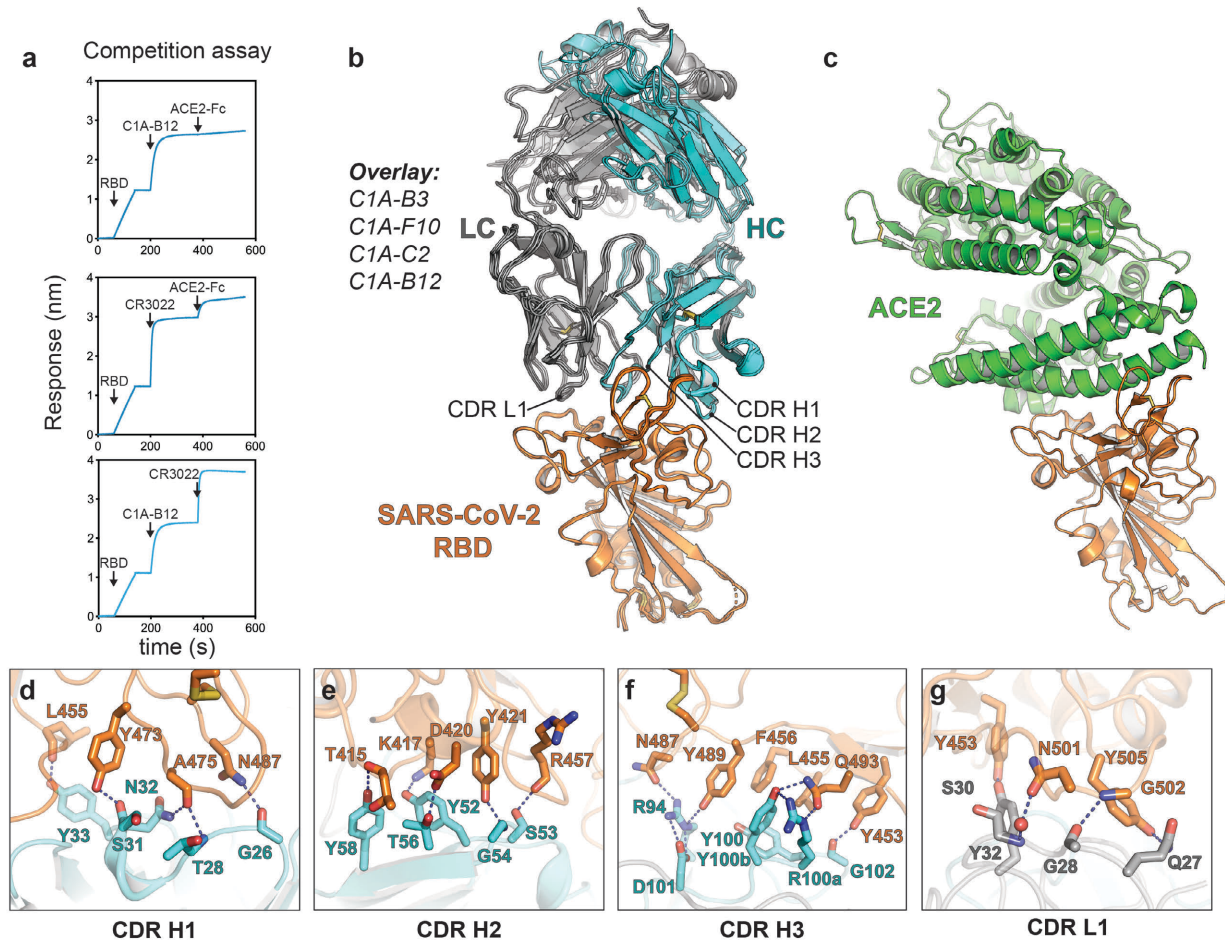

652

653 **Figure 2. SARS-CoV-2 receptor-binding domain recognition by C1A-IGHV3-53 antibodies.** (a)  
654 BLI-based competition assay for C1A-B12 Fab, CR3022 Fab, and human ACE2-ectodomain Fc fusion  
655 protein (ACE2-Fc) binding to the SARS-CoV-2 RBD. Arrows show the time point at which the indicated  
656 protein was added. Representative results of two replicates for each experiment are shown. (b)  
657 Overlay of ribbon diagrams for X-ray crystal structures of Fab/SARS-CoV-2 RBD complexes. CDR  
658 loops contacting the RBD are indicated. (c) Ribbon diagram of the X-ray crystal structure of the SARS-  
659 CoV-2 RBD bound to the ACE2 ectodomain (PDB ID: 6M0J)<sup>44</sup> with the SARS-CoV-2 RBD in the same  
660 orientation as shown in *b* for comparison. (d-g) Details of the interface between the SARS-CoV-2 RBD  
661 and antibody CDR loops for antibody C1A-B3.



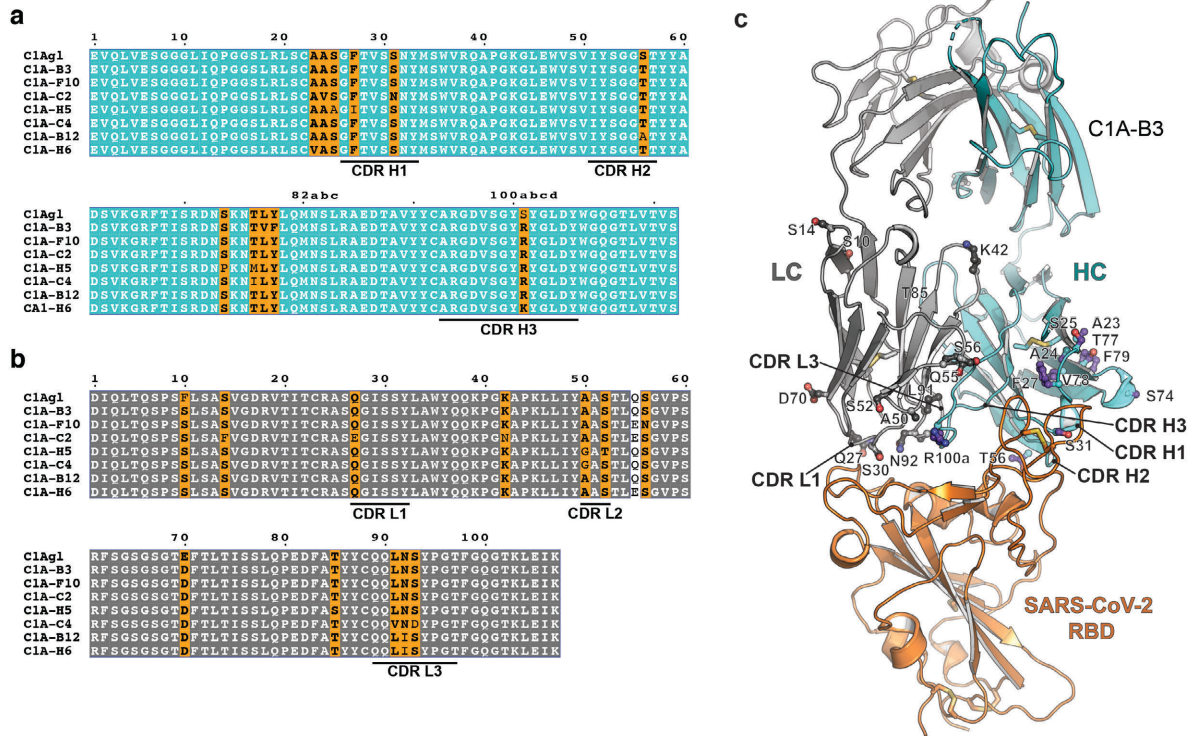

662  
663 **Figure 3. Positions of somatic changes on C1A-IGHV3-53-derived antibodies.** Alignment of  
664 antibody variable heavy chain gene sequences (a) or variable light chain (b) gene sequences. C1A-gl  
665 are germline revertant sequences designed using IMGT/V-QUEST<sup>31</sup>. Panels were generated using  
666 ESPrit<sup>345</sup> and modified. The Kabat numbering scheme is used. (c) Ribbon diagram of crystal structure  
667 of the C1A-B3 Fab/RBD complex showing the location of somatic mutations.  
668  
669

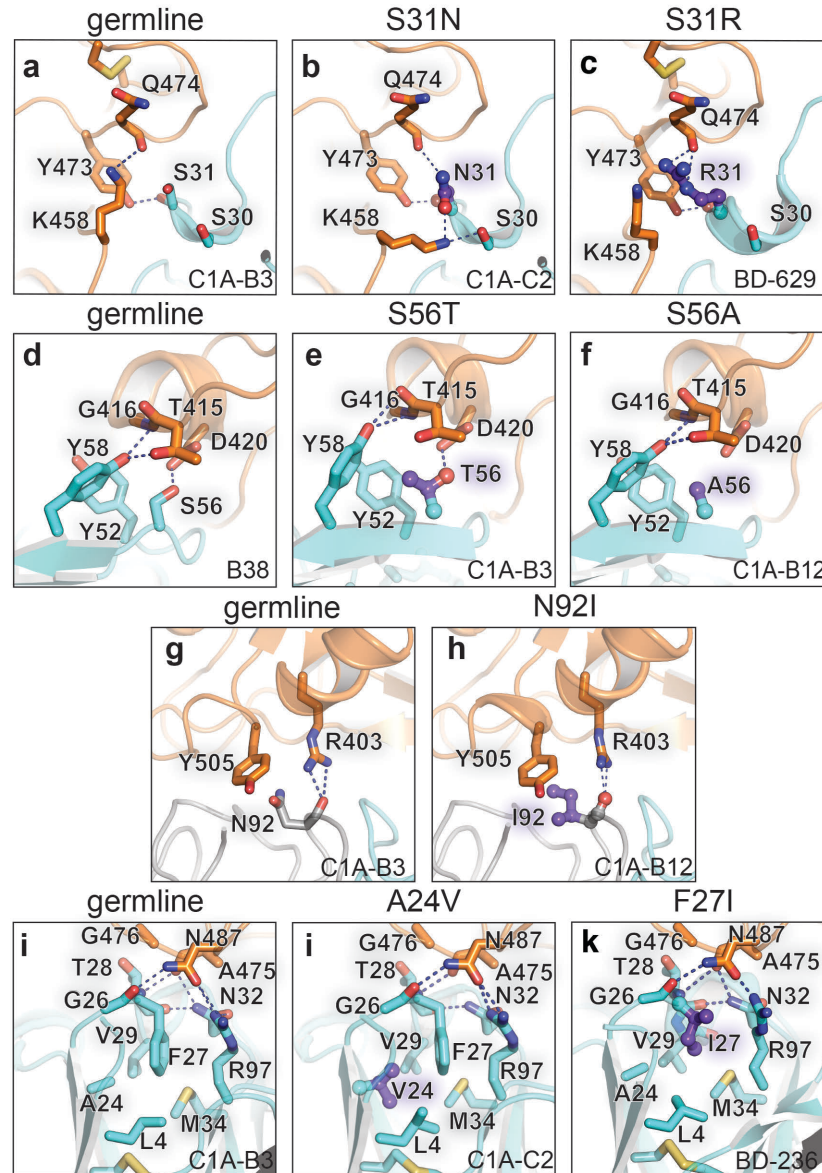

670  
671  
672  
673  
674  
675  
676  
677  
678

**Figure 4. Antibody somatic mutations at the SARS-CoV-2 RBD interface.** Interactions of CDR H1 residue 31 with the RBD are shown for C1A-B3 (a), C1A-C2 (b), or BD-629 (PDB: 7CH5)<sup>8</sup> (c). Interactions of CDR H2 residue 56 with the RBD are shown for B38 (PDB: 7BZ5)<sup>4</sup> (d), C1A-B3 (e), or C1A-B12 (f). Interactions of CDR L3 residue 92 with the RBD are shown for C1A-B3 (g) or C1A-B12 (h). Interactions occurring at the base of CDR H1 near the framework regions are shown for C1A-B3 (i), C1A-C2 (j), or BD-236 (PDB: 7CHB)<sup>8</sup> (k). The color scheme for the RBD and antibody Fab is the same as the one showed in Figure 2b. “Germline” indicates baseline interactions occurring when a given residue is not somatically mutated; mutations are otherwise listed on top of the panel.

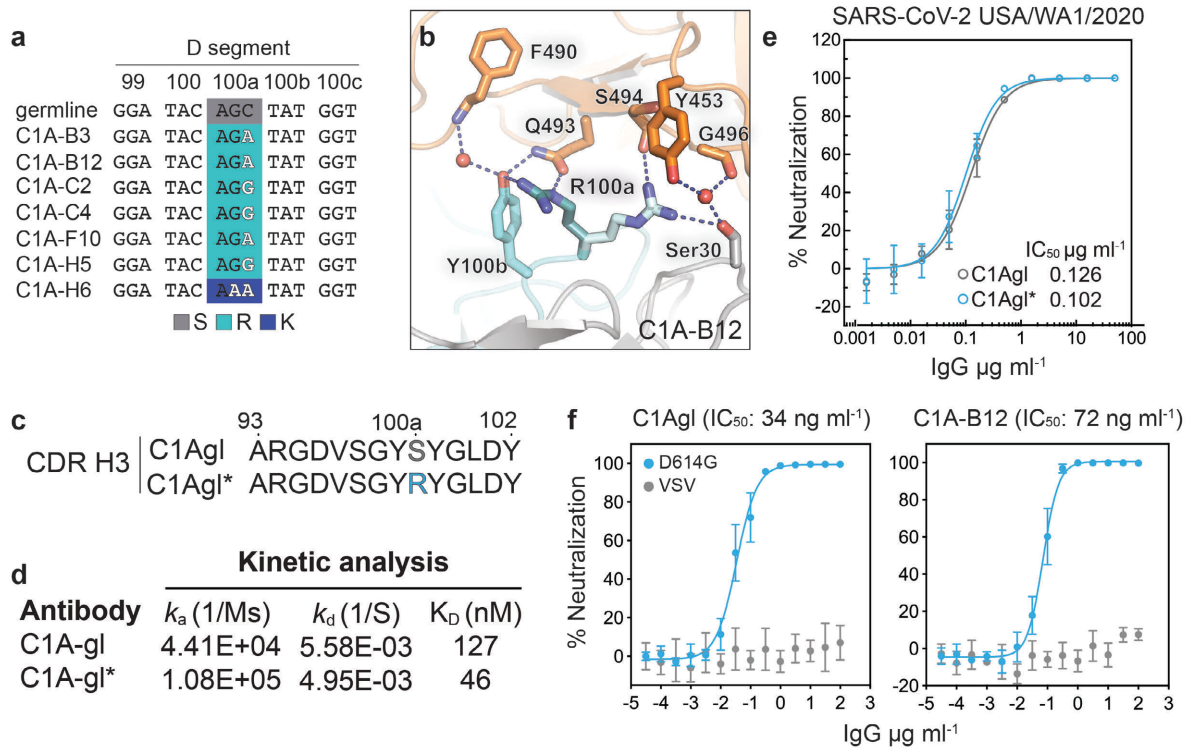

679

680 **Figure 5. A germline revertant antibody neutralizes SARS-CoV-2.**

681 (a) Nucleotide sequences of D segment of C1A-IGHV3 antibodies. Substitutions acquired during  
 682 somatic mutation causing the S100aR or S100aK substitutions are highlighted. (b) Ribbon diagram of  
 683 C1A-B12/RBD complex showing interactions occurring with alternate side chain conformers of CDR  
 684 H3 residue R100a. (c) Amino acid sequences for CDR H3 loops of germline revertant antibodies C1Agl  
 685 and C1Agl\*. (d) Results of kinetic analysis of binding for Fabs on immobilized SARS-CoV-2 RBD as  
 686 measured by BLI. (e) Results of PRNT assay with infectious SARS-CoV-2 (strain USA/WA1/2020)  
 687 and the indicated monoclonal antibodies. Data are normalized to a no antibody control. Means  $\pm$   
 688 standard deviation from three experiments performed in triplicate (n=6). Error bars indicate standard  
 689 deviation. For some data points, error bars are smaller than symbols. (f) Dose response neutralization  
 690 assay results with SARS-CoV-2 lentivirus pseudotype with the D614G mutation. Data are normalized  
 691 to a no antibody control. Means  $\pm$  standard deviation from two experiments performed in triplicate  
 692 (n=6). For some data points, error bars are smaller than symbols.

693

694

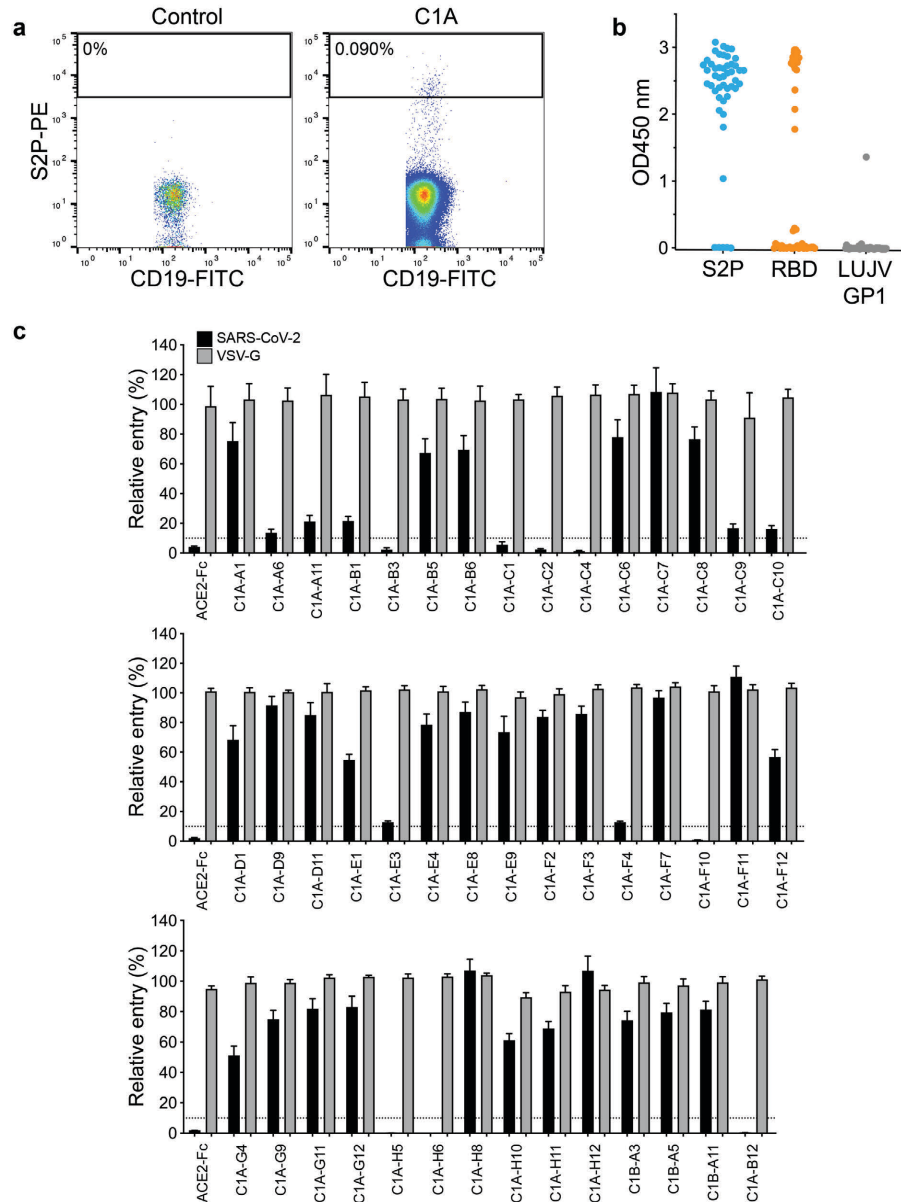

695

696 **Supplementary Figure 1. Monoclonal antibody isolation from a COVID-19 convalescent**  
 697 **individual.** (a) Density plot from a FACS experiment to isolate memory B cells that bind phycoerythrin  
 698 (PE)-labelled streptavidin tetramers coupled to a prefusion-stabilized SARS-CoV-2 S construct (S2P-  
 699 PE). The approximate location of the sorting gate is shown as a box, and the percentage of cells that  
 700 fall within the gate is indicated. The left panel is for a control donor and the right panel is for a COVID-  
 701 19 convalescent donor. CD19 is a B-cell marker. (b) Whisker plot showing ELISA values for IgG  
 702 binding to S2P, the SARS-CoV-2 RBD, or the control protein Lujo virus (LUJV) GP1. Antibodies were  
 703 added at a single concentration of  $100 \mu\text{g ml}^{-1}$ . (c) SARS-CoV-2 lentivirus pseudotypes were pre-  
 704 incubated with  $100 \mu\text{g ml}^{-1}$  of the indicated IgG or ACE2-Fc fusion protein (ACE2-Fc) and the mixture  
 705 was used to infect HEK293T-hACE2 cells. Entry levels were quantified 48 h later using FACS. VSV  
 706 lentivirus pseudotype is included as a control. Data are normalized to a no antibody control. Dashed  
 707 line indicates 10% relative entry. Means  $\pm$  standard deviation from two experiments performed in  
 708 triplicate (n=6).  
 709



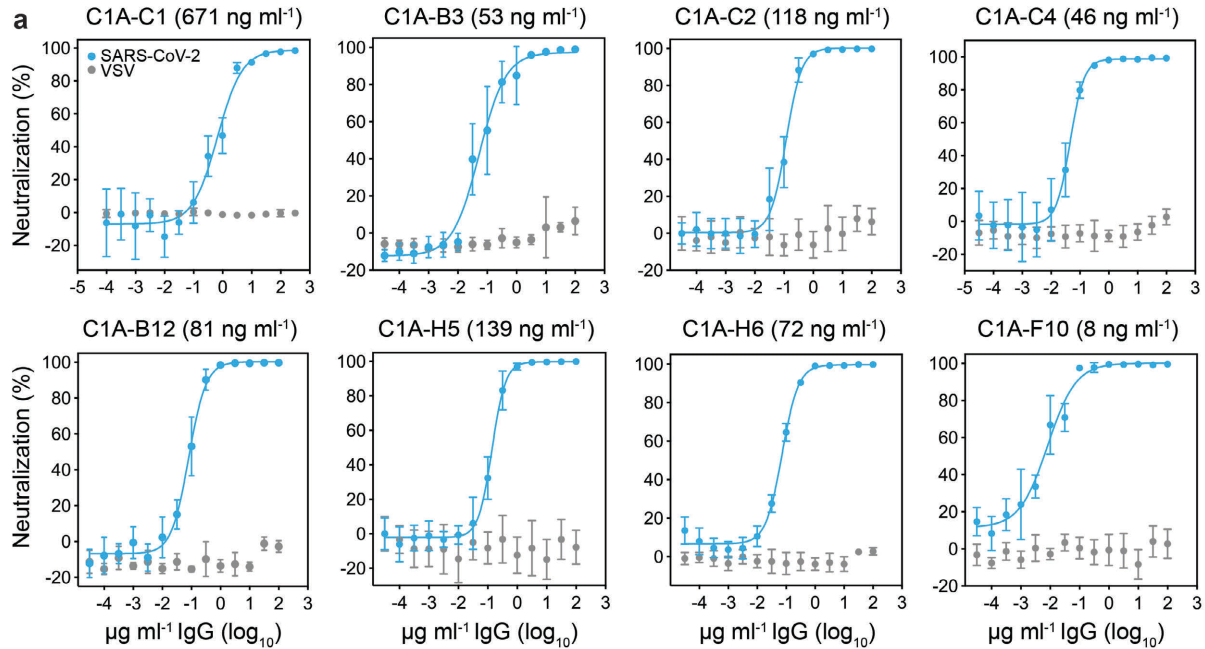

**b SARS-CoV-2 USA/WA1/2020**

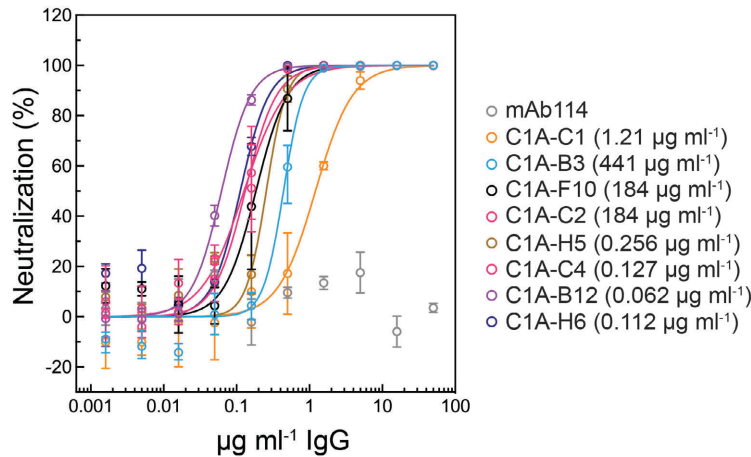

710

711 **Supplementary Figure 2. SARS-CoV-2 pseudotype and infectious virus neutralization assays.**

712 (a) SARS-CoV-2 lentivirus pseudotypes were pre-incubated with monoclonal antibodies at the  
 713 indicated concentrations and the mixture was used to infect HEK293T-hACE2 cells. Entry levels were  
 714 quantified 48 h later using FACS. VSV pseudotypes are included as a control. Data are normalized to  
 715 a no antibody control. Means  $\pm$  standard deviation from two experiments performed in triplicate (n=6).  
 716 IC<sub>50</sub> values are shown in parentheses. (b) Infectious SARS-CoV-2 (strain USA/WA1/2020) was  
 717 incubated with monoclonal antibodies at the indicated concentration with infection of Vero E6 cells  
 718 subsequently measured in PRNT assay<sup>46</sup>. Monoclonal antibody mAb114 is included as a control. Each  
 719 monoclonal antibody was serially diluted in Dulbecco's phosphate Buffered Saline (DPBS) using half-  
 720 log dilutions starting at a concentration of 50  $\mu\text{g ml}^{-1}$ . Means  $\pm$  standard deviation from three  
 721 experiments performed in triplicate (n=9). Data are normalized to a no antibody control. For some data  
 722 points, error bars are smaller than symbols.  
 723

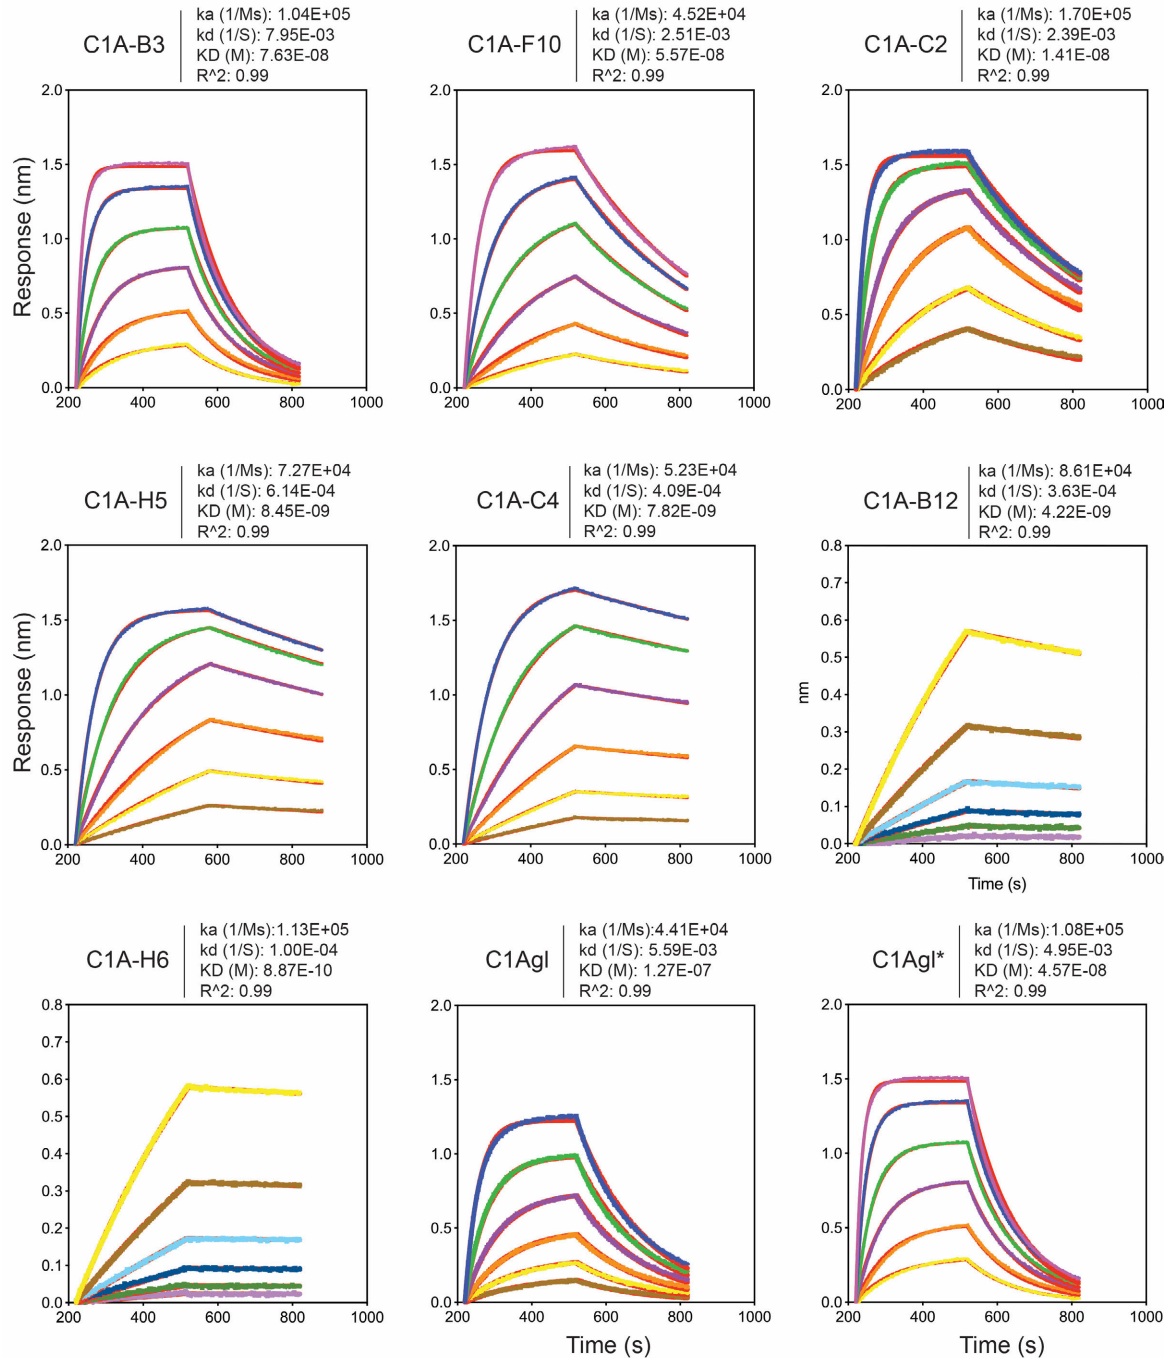

724

725 **Supplementary Figure 3. Fab binding kinetics to the SARS-CoV-2 receptor-binding domain.** Fab  
726 affinities against the SARS-CoV-2 RBD were measured using biolayer interferometry (BLI). Red lines  
727 represent the fit for a 1:1 binding model, and alternate colors represent response curves measured at  
728 varying concentrations. Binding kinetics were measured for six concentrations of Fab at 2-fold dilution  
729 ranging from 500 to 15.6 nM (for Fab C1A-B3, C1A-F10, C1Agl, C1Agl\*), 250 to 7.8 nM (C1A-C2,  
730 C1A-H5, C1A-C4), and from 15.6 to 0.49 nM (Fab C1A-B12 and C1A-H6), ensuring that each dilution  
731 series had concentrations both above and below the dissociation constant (KD). Representative  
732 results of two replicates for each experiment are shown.

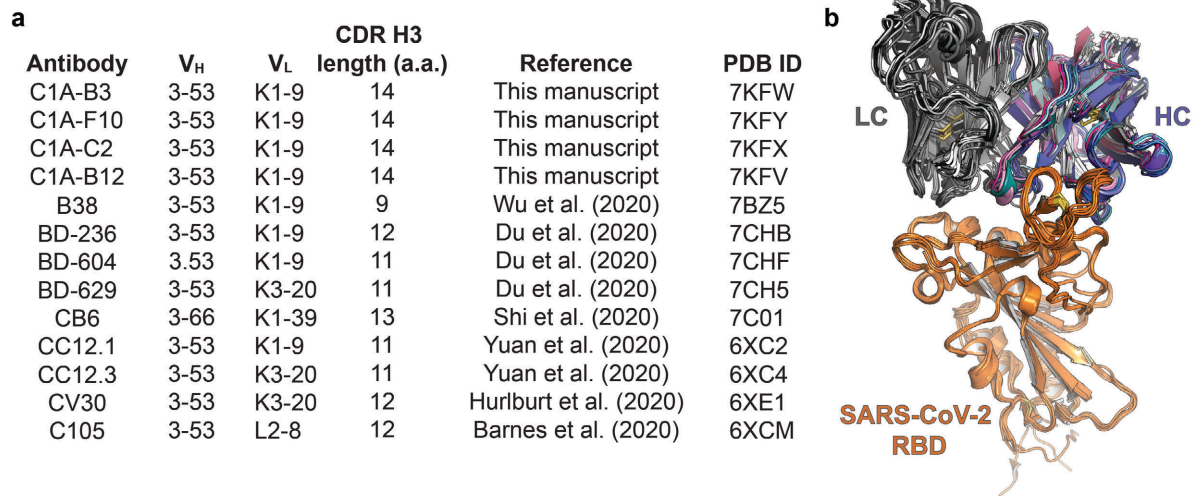

733  
 734 **Supplementary Figure 4. Structural comparison of IGHV3-53/3-66-derived antibodies.** (a) Gene  
 735 usage and CDR H3 lengths IGHV3-53/3-66 antibodies included in our analysis. CDR H3 length was  
 736 determined using IMGT/V-QUEST definitions<sup>31</sup>. (b) Structural alignment of variable heavy (V<sub>H</sub>) and  
 737 variable light (V<sub>L</sub>) portion of Fabs derived from IGHV3-53/3-66 bound to the SARS-CoV-2 RBD for all  
 738 antibodies listed in (a). a.a.: amino acids. PDB ID: protein data bank identification code.

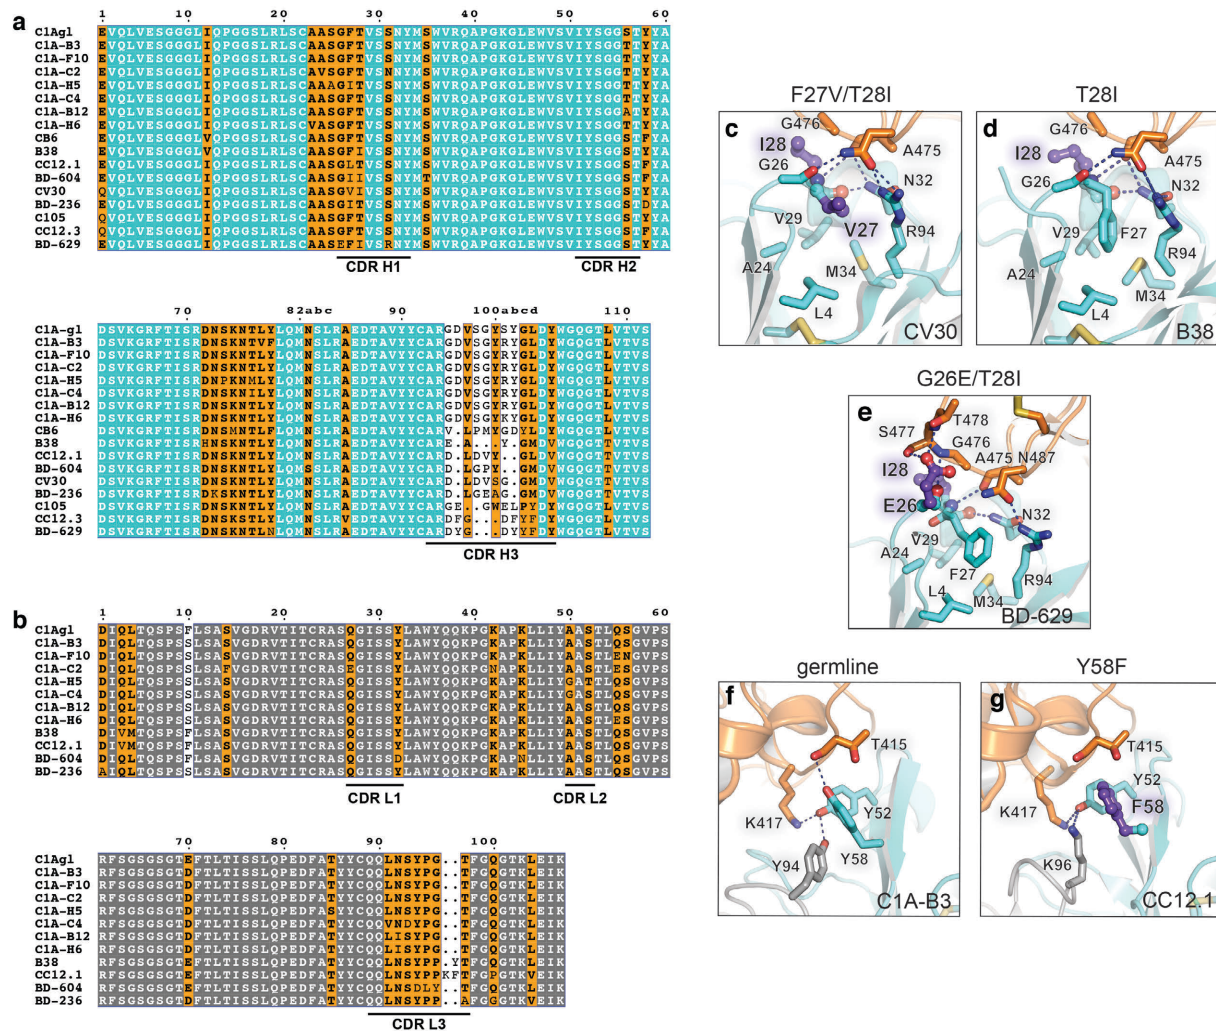



756 **Supplementary Table 1.** Properties of monoclonal antibodies isolated from a COVID-19 convalescent  
 757 individual.  
 758

759

|     | Andibody | V <sub>H</sub> gene | CDR H3 (a.a.) | Identity (%) | V <sub>L</sub> gene | CDR L3 (a.a.) | Identity (%) | Neut. | ELISA (OD 450 nm) |      |       |
|-----|----------|---------------------|---------------|--------------|---------------------|---------------|--------------|-------|-------------------|------|-------|
|     |          |                     |               |              |                     |               |              |       | S2P               | RBD  | Ctrl  |
| 760 | C1A-A1   | IGHV1-69            | 15            | 99.31        | IGKV3-11            | 11            | 99.64        | -     | 2.46              | 0.26 | 0.00  |
|     | C1A-A6   | IGHV3-11            | 15            | 98.96        | IGKV1-13            | 9             | 98.92        | +     | 2.55              | 2.81 | 0.00  |
| 761 | C1A-A11  | IGHV3-30            | 20            | 99.31        | IGKV1-33            | 9             | 99.28        | +     | 2.87              | 2.85 | -0.01 |
|     | C1A-B1   | IGHV1-2*02          | 18            | 97.57        | IGKV3-20            | 10            | 98.58        | +     | 2.44              | 0.04 | 0.00  |
| 762 | C1A-B3   | IGHV3-53            | 14            | 97.89        | IGKV1-9             | 9             | 98.92        | ++    | 2.66              | 2.94 | 0.00  |
|     | C1A-B5   | IGHV4-59*11         | 11            | 94.74        | IGKV4-1*01          | 9             | 95.96        | -     | 2.73              | 0.04 | 0.00  |
| 763 | C1A-B6   | IGHV1-24            | 14            | 98.61        | IGLV2-8             | 10            | 99.31        | -     | 3.08              | 0.00 | 0.00  |
|     | C1A-B12  | IGHV3-53            | 14            | 98.6         | IGKV1-9             | 9             | 98.57        | ++    | 2.69              | 2.97 | -0.01 |
| 764 | C1A-C1   | IGHV3-23            | 14            | 99.31        | IGKV1-39            | 10            | 100          | ++    | 2.95              | 2.97 | -0.01 |
|     | C1A-C2   | IGHV3-53            | 14            | 98.6         | IGKV1-9             | 9             | 97.49        | ++    | 2.81              | 2.86 | -0.01 |
| 765 | C1A-C4   | IGHV3-53            | 14            | 98.25        | IGKV1-9             | 9             | 97.13        | ++    | 2.89              | 2.85 | 0.00  |
|     | C1A-C6   | IGHV1-69            | 15            | 98.96        | IGKV3-11            | 11            | 98.92        | -     | 2.58              | 0.02 | 0.01  |
| 766 | C1A-C7   | IGHV4-39            | 12            | 99.31        | IGLV2-14            | 10            | 94.79        | -     | 1.04              | 2.08 | 1.37  |
|     | C1A-C8   | IGHV1-24            | 16            | 99.65        | IGLV3-21            | 12            | 98.57        | -     | 3.02              | 0.00 | -0.01 |
| 767 | C1A-C9   | IGHV1-69            | 14            | 97.92        | IGKV1-39            | 8             | 98.92        | +     | 2.99              | 2.93 | 0.00  |
|     | C1A-C10  | IGHV3-23            | 17            | 98.61        | IGLV2-23            | 12            | 99.65        | +     | 2.75              | 0.04 | 0.01  |
| 768 | C1A-D1   | IGHV4-39            | 18            | 91.75        | IGKV1-33            | 9             | 93.19        | -     | 2.06              | 0.30 | 0.05  |
|     | C1A-D9   | IGHV3-30            | 20            | 98.61        | IGKV2-30            | 10            | 100          | -     | 2.66              | 1.78 | 0.02  |
| 769 | C1A-D11  | IGHV1-69            | 14            | 98.26        | IGKV3-11            | 11            | 99.28        | -     | 2.39              | 0.00 | -0.01 |
|     | C1A-E1   | IGHV3-9*01          | 13            | 89.58        | IGKV1-39            | 10            | 91.04        | -     | 2.70              | 2.82 | -0.01 |
| 770 | C1A-E3   | IGHV1-18            | 16            | 98.61        | IGKV1-39            | 5             | 98.92        | +     | 2.74              | 2.86 | 0.00  |
|     | C1A-E4   | IGHV3-30            | 14            | 97.92        | IGKV3-20            | 9             | 100          | -     | 2.43              | 0.03 | 0.00  |
| 771 | C1A-E8   | IGHV3-48            | 21            | 97.22        | IGKV2-28            | 9             | 100          | -     | 2.73              | 0.02 | 0.01  |
|     | C1A-E9   | IGHV3-30            | 14            | 100          | IGKV3-20            | 9             | 100          | -     | 1.81              | 0.00 | 0.00  |
| 772 | C1A-F2   | IGHV3-30-3          | 15            | 99.65        | IGKV2-28            | 8             | 99.66        | -     | 2.25              | 0.01 | 0.00  |
|     | C1A-F3   | IGHV4-61            | 13            | 98.63        | IGKV1-39            | 10            | 99.28        | -     | 2.40              | 0.07 | 0.01  |
| 773 | C1A-F4   | IGHV3-30-3          | 14            | 99.65        | IGKV1-5             | 9             | 99.64        | +     | 2.84              | 2.77 | 0.00  |
|     | C1A-F7   | IGHV3-15            | 11            | 91.84        | IGKV4-1             | 9             | 93.6         | -     | 2.42              | 0.01 | 0.00  |
| 774 | C1A-F10  | IGHV3-53            | 14            | 97.89        | IGKV1-9             | 9             | 98.21        | ++    | 2.98              | 2.69 | 0.00  |
|     | C1A-F11  | IGHV1-69            | 21            | 89.24        | IGKV1-33            | 8             | 94.98        | -     | 2.39              | 2.37 | 0.00  |
| 775 | C1A-F12  | IGHV4-39            | 15            | 90.03        | IGLV1-40            | 11            | 95.49        | -     | 2.62              | 2.78 | 0.01  |
| 776 | C1A-G4   | IGHV3-23            | 17            | 99.65        | IGLV2-23            | 11            | 99.65        | -     | 2.57              | 0.00 | 0.00  |
|     | C1A-G9   | IGHV3-30-3          | 14            | 98.61        | IGKV3-20            | 8             | 100          | -     | 2.46              | 0.01 | 0.00  |
| 777 | C1A-G11  | IGHV1-69            | 12            | 97.92        | IGKV1-5             | 9             | 99.28        | -     | 2.75              | 0.01 | 0.00  |
|     | C1A-G12  | IGHV3-30-3          | 14            | 98.26        | IGKV3-15            | 8             | 98.92        | -     | 2.51              | 0.07 | 0.07  |
| 778 | C1A-H5   | IGHV3-53            | 14            | 97.54        | IGKV1-9             | 9             | 97.49        | ++    | 2.69              | 2.67 | 0.00  |
|     | C1A-H6   | IGHV3-53            | 14            | 98.95        | IGKV1-9             | 9             | 98.21        | ++    | 2.90              | 2.74 | 0.04  |
| 779 | C1A-H10  | IGHV3-21            | 18            | 99.31        | IGKV3-15            | 10            | 100          | -     | 2.64              | 0.03 | 0.02  |
|     | C1A-H11  | IGHV3-30            | 16            | 98.61        | IGLV2-14            | 10            | 99.31        | -     | 2.27              | 0.00 | 0.00  |
| 780 | C1A-H12  | IGHV4-39            | 15            | 98.28        | IGKV3-15            | 9             | 99.28        | -     | 2.66              | 0.01 | 0.01  |
|     | C1B-A3   | IGHV3-30-3          | 14            | 99.65        | IGKV3-11            | 9             | 100          | -     | 2.00              | 0.02 | 0.01  |
|     | C1B-A5   | IGHV3-30-3          | 14            | 99.65        | IGKV3-20            | 9             | 98.94        | -     | 2.20              | 0.01 | 0.01  |
|     | C1B-A11  | IGHV3-30-3          | 14            | 98.26        | IGKV3-20            | 9             | 99.29        | -     | 2.35              | 0.28 | 0.00  |

781 Antibodies highlighted in gray are somatic variants of the same antibody. CDR loop lengths are shown  
 782 as numbers of amino acids (a.a.). ELISA values are colored in shades of blue according to their  
 783 magnitude; darker shades are reflective of a stronger signal.

784  
785  
786  
787

**Supplementary Table 2. Data collection and refinement statistics**

|                                                     | C1A-B3/RBD <sup>a</sup><br>(PDB 7KFV)                 | C1A-B12/RBD <sup>a</sup><br>(PDB 7KFW)                | C1A-C2/RBD <sup>a</sup><br>(PDB 7KFX) | C1A-F10/RBD <sup>a</sup><br>(PDB 7KFY) |
|-----------------------------------------------------|-------------------------------------------------------|-------------------------------------------------------|---------------------------------------|----------------------------------------|
| <b>Data collection</b>                              |                                                       |                                                       |                                       |                                        |
| Space group                                         | <i>P</i> 2 <sub>1</sub> 2 <sub>1</sub> 2 <sub>1</sub> | <i>P</i> 2 <sub>1</sub> 2 <sub>1</sub> 2 <sub>1</sub> | <i>C</i> 222 <sub>1</sub>             | <i>C</i> 222 <sub>1</sub>              |
| Cell dimensions                                     |                                                       |                                                       |                                       |                                        |
| <i>a</i> , <i>b</i> , <i>c</i> (Å)                  | 84.8, 113.3,<br>268.89                                | 84.8, 113.3,<br>268.9                                 | 83.5, 149.2,<br>146.1                 | 85.7, 146.8,<br>144.6                  |
| α,β,γ (°)                                           | 90.00, 90.00,<br>90.00                                | 90.00, 90.00,<br>90.00                                | 90.00, 90.00,<br>90.00                | 90.00, 90.00,<br>90.00                 |
| Resolution (Å)                                      | 200-2.77 (2.94-<br>2.77) <sup>b</sup>                 | 200-2.10 (2.23-<br>2.10) <sup>b</sup>                 | 200-2.22 (2.36-<br>2.22) <sup>b</sup> | 200-2.16 (2.29-<br>2.16) <sup>b</sup>  |
| <i>R</i> <sub>sym</sub>                             | 0.38 (3.17) <sup>b</sup>                              | 0.238 (2.01) <sup>b</sup>                             | 0.136 (2.23) <sup>b</sup>             | 0.118 (1.13) <sup>b</sup>              |
| <i>R</i> <sub>pim</sub>                             | 0.11 (1.03) <sup>b,c</sup>                            | 0.095 (0.85) <sup>b,c</sup>                           | 0.062 (1.01) <sup>b,c</sup>           | 0.076 (0.61) <sup>b,c</sup>            |
| <i>I</i> / σ                                        | 5.4 (0.7) <sup>b</sup>                                | 9.0 (1.4) <sup>b</sup>                                | 6.9 (0.6) <sup>b</sup>                | 6.2 (0.7) <sup>b</sup>                 |
| Completeness (%)                                    | 98.1 (88.6) <sup>b</sup>                              | 98.9 (94.7) <sup>b</sup>                              | 99.1 (97.1) <sup>b</sup>              | 94.0 (89.4) <sup>b</sup>               |
| Redundancy                                          | 6.9 (6.5) <sup>b</sup>                                | 7.0 (6.4) <sup>b</sup>                                | 3.6 (3.6) <sup>b</sup>                | 2.1 (2.0) <sup>b</sup>                 |
| <b>Refinement</b>                                   |                                                       |                                                       |                                       |                                        |
| Resolution (Å)                                      | 133.92-2.79                                           | 134.44-2.10                                           | 74.60-2.23                            | 74.04-2.16                             |
| No. reflections                                     | 63645                                                 | 149225                                                | 44541                                 | 48373                                  |
| <i>R</i> <sub>work</sub> / <i>R</i> <sub>free</sub> | 0.19/0.23                                             | 0.18/0.22                                             | 0.19/0.23                             | 0.19/0.22                              |
| No. atoms                                           |                                                       |                                                       |                                       |                                        |
| Protein                                             | 14414                                                 | 14511                                                 | 4861                                  | 4855                                   |
| Ligand/ion                                          | 42                                                    | 42                                                    | 14                                    | 14                                     |
| Water                                               | 400                                                   | 1642                                                  | 325                                   | 532                                    |
| <i>B</i> -factors (Å <sup>2</sup> )                 |                                                       |                                                       |                                       |                                        |
| Protein                                             | 88                                                    | 47                                                    | 63                                    | 52                                     |
| Ligand/ion                                          | 96                                                    | 99                                                    | 103                                   | 101                                    |
| Water                                               | 66                                                    | 53                                                    | 65                                    | 55                                     |
| R.m.s. deviations                                   |                                                       |                                                       |                                       |                                        |
| Bond lengths<br>(Å)                                 | 0.008                                                 | 0.008                                                 | 0.008                                 | 0.008                                  |
| Bond angles (°)                                     | 0.980                                                 | 0.970                                                 | 1.000                                 | 1.000                                  |

788 <sup>a</sup> Numbers of crystals for C1A-B3, C1A-B12, C1A-C2 and C1A-F10 data were 1 each.

789 <sup>b</sup> Values in parentheses are for the highest-resolution shell.

790 <sup>c</sup> Values from program *aimless*.

791

792

793

794

795

796

797

798

799
